# Supplementary material
Source: ML conference proceedings conference paper supplement (https://proceedings.neurips.cc/paper_files/paper/2023/hash/e359ebe56ba306b674e8952349c6049e-Abstract.html)
Supplement: Supplementary file 1 [file e359ebe56ba306b674e8952349c6049e-Supplemental-Conference.pdf]

---

# Scan and Snap: Understanding Training Dynamics and Token Composition in 1-layer Transformer

---

Anonymous Author(s)

Affiliation

Address

email

## Abstract

Transformer architecture has shown impressive performance in multiple research domains and has become the backbone of many neural network models. However, there is limited understanding on how it works. In particular, with a simple predictive loss, how the representation emerges from the gradient *training dynamics* remains a mystery. In this paper, for 1-layer transformer with one self-attention layer plus one decoder layer, we analyze its SGD training dynamics for the task of next token prediction in a mathematically rigorous manner. We open the black box of the dynamic process of how the self-attention layer combines input tokens, and reveal the nature of underlying inductive bias. More specifically, with the assumption (a) no positional encoding, (b) long input sequence, and (c) the decoder layer learns faster than the self-attention layer, we prove that self-attention acts as a *discriminative scanning algorithm*: starting from uniform attention, it gradually attends more to distinct key tokens for a specific next token to be predicted, and pays less attention to common key tokens that occur across different next tokens. Among distinct tokens, it progressively drops attention weights, following the order of low to high co-occurrence between the key and the query token in the training set. Interestingly, this procedure does not lead to winner-takes-all, but stops due to a *phase transition* that is controllable by the learning rates of the two layers, leaving (almost) fixed token combination. We verify this *scan and snap* dynamics on synthetic and real-world data (WikiText).

## 1 Introduction

The Transformer architecture [66] has shown wide applications in multiple research domains, including natural language processing [20, 55, 13], computer vision [21, 43, 31], speech [71, 8], multimodality [54, 7], etc. Recently, large language models (LLMs) based on decoder-only Transformer architecture also demonstrate impressive performance [13, 17, 50], after fine-tuned with instruction data [18] or reward models [61]. Why a pre-trained model, often supervised by simple tasks such as predicting the next word [13, 55, 50] or fill in the blanks [20, 62, 56], can learn highly valuable representations for downstream tasks, remains a mystery.

Many previous works exist to understand how Transformer works. It has been shown that Transformer is a universal approximator [72], can approximate Turing machines [67, 52], and can perform a diverse set of tasks, e.g., hierarchical parsing of context-free grammar [75], if its weights are set properly. However, it is unclear whether the weights designed to achieve specific tasks are at a critical point, or can be learned by SoTA optimizers (e.g., SGD, Adam [36], AdaFactor [57], AdamW [44]). In fact, many existing ML models, such as  $k$ -NN, Kernel SVM, or MLP, are also universal approximators, while their empirical performance is often way behind Transformer.

To demystify such a behavior, it is important to understand the *training dynamics* of Transformer, i.e., how the learnable parameters change over time during training. In this paper, as a first step, we formally characterize the SGD training dynamics of 1-layer position-encoding-free Transformer for

next token prediction, a popular training paradigm used in GPT series [55, 13], in a mathematically rigorous manner. The 1-layer Transformer contains one softmax self-attention layer followed by one decoder layer which predicts the next token. Under the assumption that the sequence is long, and the decoder learns faster than the self-attention layer, we prove the following interesting dynamic behaviors of self-attention during training. **Frequency Bias**: it progressively pays more attention to key tokens that co-occur a lot with the query token, and loses attention to tokens that co-occur less. **Discriminative Bias**: it pays attention to distinct tokens that appear uniquely given the next token to be predicted, while loses interest to common tokens that appear across multiple next tokens. These two properties suggest that self-attention implicitly runs an algorithm of *discriminative scanning*, and has an inductive bias to favor unique key tokens that frequently co-occur with the query ones.

Furthermore, while self-attention layer tends to become more sparse during training, as suggested by Frequency Bias, we discover that it will not collapse to one-hot, due to a *phase transition* in the training dynamics. In the end, the learning does not converge to any stationary points with zero gradient, but ventures into a region where the attention changes slowly (i.e., logarithmically over time), and appears frozen and learned. We further show that the onset of the phase transition are controlled by the learning rates: large learning rate gives sparse attention patterns, and given fixed self-attention learning rate, large decoder learning rate leads to faster phase transition and denser attention patterns. Finally, the SGD dynamics we characterize in this work, named **scan and snap**, is verified in both synthetic and simple real-world experiments on WikiText-103 [47].

A few recent works also study Transformer dynamics. Compared to [40] that uses  $\ell_2$  loss, our analysis focuses on cross-entropy, which is more realistic, impose no prior knowledge on possible attention patterns inaccessible to training, and allow tokens to be shared across topics. Compared to [35] that analyzes “positional attention” that is independent of input data with symmetric initialization, our analysis focus on attention on input data without symmetric assumptions.

## 2 Related Works

**Expressiveness of Attention-based Models.** A line of work studies the expressive power of attention-based models. One direction focuses on the universal approximation power [72, 11, 12, 19, 52]. More recent works present fine-grained characterizations of the expressive power for certain functions in different settings, sometimes with statistical analyses [26, 27, 49, 41, 1, 29, 75, 70, 3, 9]. Different from our work, the results in these papers are existential and do not take training dynamics into consideration.

**Training Dynamics of Neural Networks.** Previous works analyze the training dynamics in multi-layer linear neural networks [4, 10], in the student-teacher setting [14, 63, 60, 30, 24, 23, 76, 42, 68], and infinite-width limit [34, 16, 25, 22, 2, 5, 51, 77, 39, 15, 46, 48, 28, 45], including extensions to attention-based models [32, 69]. For self-supervised learning, works exist to analyze linear networks [64] and understand the role played by nonlinearity [65]. Focusing on attention-based models, Zhang et al. [73] study adaptive optimization methods in attention models. Jelassi et al. [35] propose an idealized setting and show the vision transformer [21] trained by gradient descent can learn spatial structure. Li et al. [40] show that the 1-layer Transformer can learn a constrained topic model, in which any word belongs to one topic, with  $\ell_2$  loss, BERT [20]-like architecture and additional assumptions on learned attention patterns. Snell et al. [59] study the dynamics of a single-head attention head to approximate the learning of a Seq2Seq architecture. While these papers also study the optimization dynamics of attention-based models, they focus on different settings and do not explain the phenomena presented in our paper.

## 3 Problem Setting

**Notation.** Let  $\{\mathbf{u}_k\}_{k=1}^M$  are  $d$ -dimensional embeddings,  $\{x_t\}$  are discrete tokens. For each token,  $x_t$  takes discrete values from 1 to  $M$  and  $\mathbf{x}_t := \mathbf{e}_{x_t} \in \mathbb{R}^M$  is the corresponding one-hot vector, i.e., the  $x_t$ -th entry of  $\mathbf{x}_t$  is 1 while others are zero.  $\mathbf{u}_{x_t}$  is the token embedding at location  $t$  in a sequence.

Let  $U = [\mathbf{u}_1, \dots, \mathbf{u}_M]^\top \in \mathbb{R}^{M \times d}$  be the embedding matrix, in which the  $k$ -th row of  $U$  is the embedding vector of token  $k$ .  $X = [\mathbf{x}_1, \dots, \mathbf{x}_{T-1}]^\top \in \mathbb{R}^{(T-1) \times M}$  is the data matrix encoding the sequence of length  $T - 1$ .  $XU \in \mathbb{R}^{(T-1) \times d}$  is the sequence of embeddings for a given sequence  $\tau := \{x_1, \dots, x_{T-1}\}$ . It is clear that  $X\mathbf{1}_M = \mathbf{1}_{T-1}$ .

We use  $X[i]$  to denote  $i$ -th sample in the sequence dataset. Similarly,  $x_t[i]$  is the token located at  $t$  in  $i$ -th sample, and  $\tau[i]$  is the  $i$ -th sequence. Let  $\mathcal{D}$  be the dataset used for training.

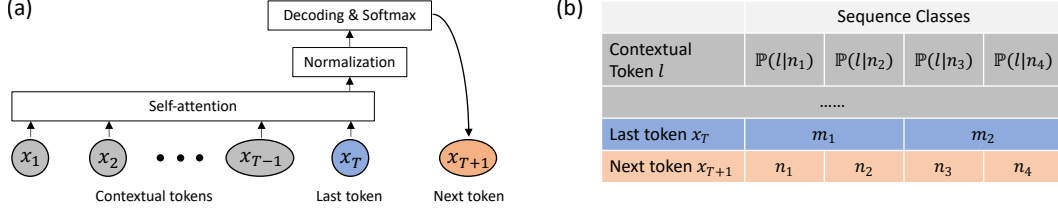

Figure 1: Overall of our setting. (a) A sequence with contextual tokens  $\{x_1, \dots, x_{T-1}\}$  and last token  $x_T$  is fed into 1-layer transformer (self-attention plus normalization and decoding) to predict the next token  $x_{T+1}$ . (b) The definition of sequence classes (Sec. 3.1). A sequence class specifies the conditional probability  $\mathbb{P}(l|m, n)$  of the contextual tokens, given the last token  $x_T = m$  and the next token  $x_{T+1} = n$ . For simplicity, we consider the case that the last token is determined by the next token:  $x_T = \psi(x_{T+1})$ , while the same last token  $m$  may correspond to multiple next tokens (i.e.,  $\psi^{-1}(m)$  is not unique).

93 **1-Layer Transformer Architecture.** Given a sequence  $\tau = \{x_1, \dots, x_T, x_{T+1}\}$ , the embedding  
 94 after 1-layer self attention is:

$$\tilde{\mathbf{u}}_T = \sum_{t=1}^{T-1} b_{tT} \mathbf{u}_{x_t}, \quad b_{tT} := \frac{\exp(\mathbf{u}_{x_t}^\top W_Q W_K^\top \mathbf{u}_{x_t} / \sqrt{d})}{\sum_{t=1}^{T-1} \exp(\mathbf{u}_{x_t}^\top W_Q W_K^\top \mathbf{u}_{x_t} / \sqrt{d})} \quad (1)$$

95 Here  $b_{tT}$  is the normalized self-attention weights ( $\sum_{t=1}^{T-1} b_{tT} = 1$ ). One important detail is that  
 96 we mask the weight that the query token attends to itself, which is also being used in previous  
 97 works (e.g., QK-shared architecture [37]). See Sec. 7 for discussions about residual connection. Let  
 98  $\mathbf{b}_T := [b_{1T}, \dots, b_{T-1,T}]^\top \in \mathbb{R}^{T-1}$  be an attention vector, then  $\mathbf{b}_T^\top \mathbf{1} = 1$  and  $\tilde{\mathbf{u}}_T = U^\top X^\top \mathbf{b}_T$ .

99  **$\ell_2$ -Normalization.** We consider adding a normalization in  $\tilde{\mathbf{u}}_T$ :  $\tilde{\mathbf{u}}_T = U^\top \text{LN}(X^\top \mathbf{b}_T)$ , where  
 100  $\text{LN}(\mathbf{x}) := \mathbf{x} / \|\mathbf{x}\|_2$ . NormFormer [58] also leverages this setting. Our analysis can also be extended  
 101 to standard LayerNorm [6], which also subtracts the mean of  $\mathbf{x}$ . Empirically  $\tilde{\mathbf{u}}_T$  or  $W_V \tilde{\mathbf{u}}_T$  is  
 102 normalized (instead of  $X^\top \mathbf{b}_T$ ) and here we use an approximation to facilitate analysis.

103 **Objective.** We maximize the likelihood of predicted  $(T+1)$ -th token using cross entropy loss:

$$\max J := \mathbb{E}_{\mathcal{D}} \left[ \mathbf{u}_{x_{T+1}}^\top W_V \tilde{\mathbf{u}}_T - \log \sum_l \exp(\mathbf{u}_l^\top W_V \tilde{\mathbf{u}}_T) \right] \quad (2)$$

104 We call  $x_T = m$  as the **last token** of the sequence, and  $x_{T+1} = n$  as the **next token** to be predicted.  
 105 Other tokens  $x_t$  ( $1 \leq t \leq T-1$ ) that are encoded in  $X$  are called **contextual tokens**. Both the  
 106 contextual and last tokens can take values from 1 to  $M$  (i.e.,  $m \in [M]$ ) and next token takes the  
 107 value from 1 to  $K$  (i.e.,  $n \in [K]$ ) where  $K \leq M$ .

### 108 3.1 Data Generation

109 Next we specify a data generation model, named *sequence class*, for our analysis.

110 **Sequence Class.** We regard the input data as a mixture of multiple *sequence classes*. Each se-  
 111 quence class is characterized by a triple  $s_{m,n} := (\mathbb{P}(l|m, n), m, n)$ . To generate a sequence instance  
 112 from the class, we first set  $x_T = m$  and  $x_{T+1} = n$ , and then generate the contextual tokens with  
 113 conditional probability  $\mathbb{P}(l|m, n)$ . Let  $\text{supp}(m, n)$  be the subset of token  $l$  with  $\mathbb{P}(l|m, n) > 0$ .

114 In this work, we consider the case that given a next token  $x_{T+1} = n$ , the corresponding sequence  
 115 always ends with a specific last token  $x_T = m =: \psi(n)$ . This means that we could index sequence  
 116 class with next token  $x_{T+1} = n$  alone:  $s_n := (\mathbb{P}(l|\psi(n), n), \psi(n), n)$ ,  $\mathbb{P}(l|m, n) = \mathbb{P}(l|n)$  and  
 117  $\text{supp}(n) := \text{supp}(\psi(n), n)$ .

118 On the other hand,  $|\psi^{-1}(m)| \geq 2$  is allowed in our analysis. Note that  $|\psi^{-1}(m)| = 1$  means that  
 119 the occurrence of token  $m$  alone decides next token  $n$  to be predicted, regardless of other tokens in  
 120 the sequence, which is a trivial case. When  $|\psi^{-1}(m)| \geq 2$ , the same last token  $m$ , combined with  
 121 other token  $l$  in the sequence with non-zero probability  $\mathbb{P}(l|m, n) > 0$ , determine the next token.

122 **Overlapping sequence class.** Two sequence classes  $s_n$  and  $s_{n'}$  *overlap* if  $\text{supp}(n) \cap \text{supp}(n') \neq \emptyset$ .

(Global) distinct and common tokens. Let  $\Omega(l) := \{n : \mathbb{P}(l|n) > 0\}$  be the subset of next tokens that co-occur with contextual token  $l$ . We now can identify two kinds of tokens: the *distinct* token  $l$  which has  $|\Omega(l)| = 1$  and the *common* token  $l$  with  $|\Omega(l)| > 1$ . Intuitively, this means that there exists one common token  $l$  so that both  $\mathbb{P}(l|n)$  and  $\mathbb{P}(l|n')$  are strictly positive, e.g., common words like ‘the’, ‘this’, ‘which’ that appear in many sequence classes. In Sec. 5, we will see how these two type of contextual tokens behave very differently when self-attention layer is involved in training: distinct tokens tend to be paid attention while common tokens tend to be ignored.

### 3.2 Reparameterization

Instead of studying the dynamics with respect to the parameters of token embedding  $U$ , key, value and query projection matrices  $W_K$ ,  $W_Q$  and  $W_V$ , we study the dynamics of two *pairwise token relation matrices*  $Y := UW_V^\top U^\top \in \mathbb{R}^{M \times M}$  and  $Z := UW_QW_K^\top U^\top / \sqrt{d} \in \mathbb{R}^{M \times M}$ . Intuitively, entries of  $Y$  and  $Z$  store the “logits” of pairs of tokens. We regard the empirical parameterization using  $U$ ,  $W_K$ ,  $W_Q$  and  $W_V$  as a specific way of parametrization of  $Y$  and  $Z$ , in order to reduce the number of parameters to be estimated. Previous work also leverage similar parameterization for self-attention layers [35, 38].

For real-world applications, the number of tokens  $M$  can be huge (e.g., the vocabulary size  $M = 50272$  in OPT-175B [74]) and directly optimize  $Y$  and  $Z$  would be prohibitive. However, as we will show in this work, from the theoretical perspective, treating  $Y$  and  $Z$  as independent variables has some unique advantages.

**Lemma 1** (Dynamics of 1-layer Transformer). *The gradient dynamics of Eqn. 2 with batchsize 1 is:*

$$\dot{Y} = \eta_Y \text{LN}(X^\top \mathbf{b}_T)(\mathbf{x}_{T+1} - \boldsymbol{\alpha})^\top, \quad \dot{Z} = \eta_Z \mathbf{x}_T(\mathbf{x}_{T+1} - \boldsymbol{\alpha})^\top Y^\top \frac{P_{X^\top \mathbf{b}_T}^\perp}{\|X^\top \mathbf{b}_T\|_2} X^\top \text{diag}(\mathbf{b}_T) X \quad (3)$$

Here  $P_v^\perp := I - vv^\top / \|v\|_2^2$  projects a vector into  $v$ ’s orthogonal complementary space,  $\eta_Y$  and  $\eta_Z$  are the learning rates for the decoder layer  $Y$  and self-attention layer  $Z$ ,  $\boldsymbol{\alpha} := [\alpha_1, \dots, \alpha_M]^\top \in \mathbb{R}^M$  and  $\alpha_m := \exp(Y^\top \text{LN}(X^\top \mathbf{b}_T)) / \mathbf{1}^\top \exp(Y^\top \text{LN}(X^\top \mathbf{b}_T))$ .

We consider  $Y(0) = Z(0) = 0$  as initial condition. This is reasonable since empirically  $Y$  and  $Z$  are initialized by inner product of  $d$ -dimensional vectors whose components are independently drawn by i.i.d Gaussian. This initial condition is also more realistic than [35] that assumes dominant initialization in diagonal elements. Since  $(\mathbf{x}_{T+1} - \boldsymbol{\alpha})^\top \mathbf{1} = 0$  and  $P_{X^\top \mathbf{b}_T}^\perp X^\top \text{diag}(\mathbf{b}_T) X \mathbf{1} = 0$ , we have  $\dot{Y} \mathbf{1} = \dot{Z} \mathbf{1} = 0$  and summation of rows of  $Z(t)$  and  $Y(t)$  remains zero. Since  $\mathbf{x}_T$  is a one-hot column vector, the update of  $Z = [z_1, z_2, \dots, z_M]^\top$  is done per row:

$$\dot{z}_m = \eta_Z X^\top [i] \text{diag}(\mathbf{b}_T[i]) X [i] \frac{P_{X^\top [i] \mathbf{b}_T[i]}^\perp}{\|X^\top [i] \mathbf{b}_T[i]\|_2} Y(\mathbf{x}_{T+1}[i] - \boldsymbol{\alpha}[i]) \quad (4)$$

where  $m = x_T[i]$  is the last token for sample  $i$ ,  $z_m$  is the  $m$ -th row of  $Z$  and  $\dot{z}_{m'} = 0$  for row  $m' \neq m = x_T[i]$ . Note that if  $x_T[i] = m$ , then  $\mathbf{b}_T[i]$  is a function of  $z_m$  only (but not a function of  $z_{m'}$  for  $m' \neq m$ ). Here we explicitly write down the current sample index  $i$ , since batchsize is 1.

### 3.3 Assumptions

To make our analysis easier, we make the following assumptions:

**Assumption 1.** We consider (a) no positional encoding, (b) The input sequence is long ( $T \rightarrow +\infty$ ) and (c) The decoder layer learns much faster than the self-attention layer (i.e.,  $\eta_Y \gg \eta_Z$ ).

Assumption 1(a) suggests that the model is (almost) permutation-invariant. Given the next token to predict  $x_{T+1} = n$  and the last token  $x_T = m$  acted as query, the remaining tokens in the sequence may shuffle. Assumption 1(b) indicates that the frequency of a token  $l$  appearing in the sequence approaches its conditional probability  $\mathbb{P}(l|m, n) := \mathbb{P}(l|x_T = m, x_{T+1} = n)$ .

Given the event  $\{x_T = m, x_{T+1} = n\}$ , suppose for token  $l$ , the conditional probability that it appears in the sequence is  $\mathbb{P}(l|m, n)$ . Then for very long sequence  $T \rightarrow +\infty$ , in expectation the number of token  $l$  appears in a sequence of length  $T$  approaches  $T\mathbb{P}(l|m, n)$ . Therefore the *per-token* self-attention weight  $c_{l|m, n}$  is computed as:

$$c_{l|m, n} := \frac{T\mathbb{P}(l|m, n) \exp(z_{ml})}{\sum_{l'} T\mathbb{P}(l'|m, n) \exp(z_{ml'})} = \frac{\mathbb{P}(l|m, n) \exp(z_{ml})}{\sum_{l'} \mathbb{P}(l'|m, n) \exp(z_{ml'})} =: \frac{\tilde{c}_{l|m, n}}{\sum_{l'} \tilde{c}_{l'|m, n}} \quad (5)$$

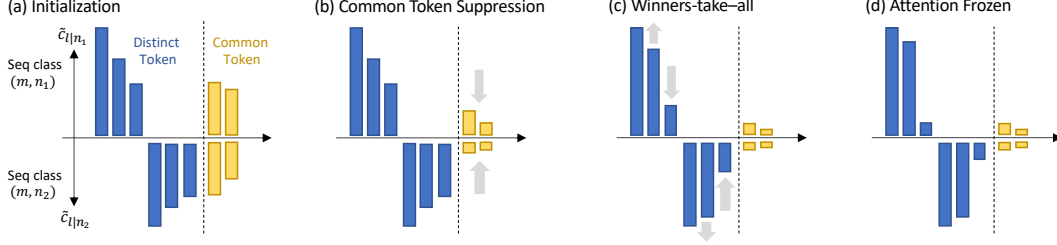

Figure 2: Overview of the training dynamics of self-attention map. Here  $\tilde{c}_{l|m,n} := \mathbb{P}(l|m,n) \exp(z_l)$  is the un-normalized attention score (Eqn. 5). **(a)** Initialization stage.  $z_l(0) = 0$  and  $\tilde{c}_{l|m,n} = \mathbb{P}(l|m,n)$ . Distinct tokens (Sec. 3.1) shown in blue, common tokens in yellow. **(b)** Common tokens (CT) are suppressed ( $z_l < 0$ , Theorem 2). **(c)** Winners-take-all stage. Distinct tokens (DT) with large initial value  $\tilde{c}_{l|m,n}(0)$  start to dominate the attention map (Sec. 5, Theorem 3). **(d)** One passing the phase transition time step  $t \geq t_0 = O(K \ln M / \eta_Y)$ , attention appears (almost) frozen (Sec. 6) and token composition is fixed in the self-attention layer.

167 Here  $z_{ml}$  is  $z_m$ 's  $l$ -th entry and  $\tilde{c}_{l|m,n} := \mathbb{P}(l|m,n) \exp(z_{ml})$  is un-normalized attention score.

168 **Lemma 2.** *Given the event  $\{x_T = m, x_{T+1} = n\}$ , when  $T \rightarrow +\infty$ , we have*

$$X^\top \mathbf{b}_T \rightarrow \mathbf{c}_{m,n}, \quad X^\top \text{diag}(\mathbf{b}_T) X \rightarrow \text{diag}(\mathbf{c}_{m,n}) \quad (6)$$

169 where  $\mathbf{c}_{m,n} = [c_{1|m,n}, c_{2|m,n}, \dots, c_{M|m,n}]^\top \in \mathbb{R}^M$ . Note that  $\mathbf{c}_{m,n}^\top \mathbf{1} = 1$ .

170 By the data generation process (Sec. 3.1), given the next token  $x_{T+1} = n$ , the last token  $x_T = m$  is  
171 uniquely determined. In the following, we just use  $\mathbf{c}_n$  to represent  $\mathbf{c}_{m,n}$  (and similar for  $\tilde{\mathbf{c}}_n$ ).

## 172 4 Dynamics of $Y$

173 We first study the dynamics of  $Y$ . From Assumption 1(c),  $Y$  learns much faster and we can treat the  
174 lower layer output (i.e.,  $X^\top \mathbf{b}_T$ ) as constant. From Lemma 2, when the sequence is long, we know  
175 given the next token  $x_{T+1} = n$ ,  $X^\top \mathbf{b}_T$  becomes fixed. Therefore, the dynamics of  $Y$  becomes:

$$\dot{Y} = \eta_Y \mathbf{f}_n (\mathbf{e}_n - \boldsymbol{\alpha}_n)^\top, \quad \boldsymbol{\alpha}_n = \frac{\exp(Y^\top \mathbf{f}_n)}{\mathbf{1}^\top \exp(Y^\top \mathbf{f}_n)} \quad (7)$$

176 Here  $\mathbf{f}_n := \frac{X^\top \mathbf{b}_T}{\|X^\top \mathbf{b}_T\|_2} \rightarrow \frac{\mathbf{c}_n}{\|\mathbf{c}_n\|_2} \in \mathbb{R}^M$ . Obviously  $\|\mathbf{f}_n\|_2 = 1$  and  $\mathbf{f}_n \geq 0$ . Define  
177  $F = [\mathbf{f}_1, \dots, \mathbf{f}_K]$ . Since the vocabulary size  $M$  typically is a huge number, and different sequence  
178 classes can cover diverse subset of vocabulary, we study the weak correlation case:

179 **Assumption 2** (Weak Correlations). *We assume  $M \gg K^2$  and  $\{\mathbf{f}_n\}_{n=1}^K$  satisfies  $F^\top F = I + E$ ,  
180 where the eigenvalues of  $E \in \mathbb{R}^{K \times K}$  satisfies  $|\lambda_1| < \frac{1}{K}$  and  $|\lambda_i(E)| \geq \frac{6}{\sqrt{M}}, \forall i \in [K]$ .*

181 Assumption 2 means that  $\mathbf{f}_n$  share some weak correlations and it immediately leads to the fact that  
182  $F^\top F$  is invertible and  $F$  is column full-rank. Note that the critical point  $Y^*$  of Eqn. 7 should satisfy  
183 that for any given  $x_{T+1} = n$ , we need  $\boldsymbol{\alpha} = \mathbf{e}_n$ . But such  $Y^*$  must contain infinity entries due to  
184 the property of the exponential function in  $\boldsymbol{\alpha}$  and we can not achieve  $Y^*$  in finite steps. To analyze  
185 Eqn. 7, we leverage a *reparameterized* version of the dynamics, by setting  $W = [\mathbf{w}_1, \dots, \mathbf{w}_K]^\top :=$   
186  $F^\top Y \in \mathbb{R}^{K \times M}$  and compute gradient update on top of  $W$  instead of  $Y$ :

187 **Lemma 3.** *Given  $x_{T+1} = n$ , the dynamics of  $W$  is (here  $\boldsymbol{\alpha}_j = \exp(\mathbf{w}_j) / \mathbf{1}^\top \exp(\mathbf{w}_j)$ ):*

$$\dot{\mathbf{w}}_j = \eta_Y \mathbb{I}(j = n) (\mathbf{e}_n - \boldsymbol{\alpha}_n) \quad (8)$$

188 While we cannot run gradient update on  $W$  directly, it can be achieved by modifying the gradient of  
189  $Y$  to be  $\dot{Y} = \eta_Y (\mathbf{f}_n - F E' \mathbf{e}_n) (\mathbf{e}_n - \boldsymbol{\alpha}_n)^\top$ . If  $\lambda_1$  is small, the modification is small as well.

190 Lemma 3 shows that for every fixed  $n$ , only the corresponding row of  $W$  is updated, which makes  
191 the analysis much easier. We now can calculate the backpropagated gradient used in Eqn. 3.

192 **Theorem 1.** *If Assumption 2 holds, the initial condition  $Y(0) = 0$ ,  $M \gg 100$ ,  $\eta_Y$  satisfies  
193  $M^{-0.99} \ll \eta_Y < 1$ , and each sequence class appears uniformly during training, then after*

194  $t \gg K^2$  steps of batch size 1 update, given event  $x_{T+1}[i] = n$ , the backpropagated gradient  
 195  $\mathbf{g}[i] := Y(\mathbf{x}_{T+1}[i] - \boldsymbol{\alpha}[i])$  takes the following form:

$$\mathbf{g}[i] = \gamma \left( \iota_n \mathbf{f}_n - \sum_{n' \neq n} \beta_{nn'} \mathbf{f}_{n'} \right) \quad (9)$$

196 Here the coefficients  $\iota_n(t)$ ,  $\beta_{nn'}(t)$  and  $\gamma(t)$  are defined in Appendix with the following properties:

- 197 • (a)  $\xi_n(t) := \gamma(t) \sum_{n' \neq n} \beta_{nn'}(t) \mathbf{f}_n^\top(t) \mathbf{f}_{n'}(t) > 0$  for any  $n \in [K]$  and any  $t$ ;
- 198 • (b) The speed control coefficient  $\gamma(t) > 0$  satisfies  $\gamma(t) = O(\eta_Y t / K)$  when  $t \leq \frac{\ln(M) \cdot K}{\eta_Y}$   
 199 and  $\gamma(t) = O\left(\frac{K \ln(\eta_Y t / K)}{\eta_Y t}\right)$  when  $t \geq \frac{2(1+\delta') \ln(M) \cdot K}{\eta_Y}$  with  $\delta' = \Theta(\frac{\ln \ln M}{\ln M})$ .

200 In the appendix, we analyze the original dynamics (Eqn. 7) when all off-diagonal elements of  $E$  are  
 201 identical, and Theorem 1 still holds but with a smaller effective learning rate  $\eta'_Y$ .

## 202 5 The dynamics of Self-attention

203 Now we analyze the dynamics of self-attention logits  $Z$ , given the dynamics of upper layer  $Y$ .

204 **Lemma 4** (Self-attention dynamics). *With Assumption 1(b) (i.e.,  $T \rightarrow +\infty$ ), Eqn. 4 becomes:*

$$\dot{\mathbf{z}}_m = \eta_Z \gamma \sum_{n \in \psi^{-1}(m)} \text{diag}(\mathbf{f}_n) \sum_{n' \neq n} \beta_{nn'} (\mathbf{f}_n \mathbf{f}_n^\top - I) \mathbf{f}_{n'}, \quad (10)$$

205 Now we study the dynamics of two types of contextual tokens (Sec. 3.1), namely *distinct tokens*  
 206 (DT) which appear only for a single next token (i.e.,  $|\Omega(l)| = 1$  with  $\Omega(l) := \{n : \mathbb{P}(l|n) > 0\}$ ),  
 207 and *common tokens* (CT) that appear across multiple next tokens ( $|\Omega(l)| > 1$ ). We show their fates  
 208 are very different: over training, **distinct tokens gain attention but common ones lose it**. For brevity,  
 209 we omit the subscript  $m$  in  $\mathbf{z}_m$  and use  $z_l$  to represent  $\mathbf{z}_{ml}$ .

210 **Theorem 2** (Fates of contextual tokens). *Let  $G_{CT}$  be the set of common tokens (CT), and  $G_{DT}(n)$   
 211 be the set of distinct tokens (DT) that belong to next token  $n$ . Then if Assumption 2 holds, under the  
 212 self-attention dynamics (Eqn. 10), we have:*

- 213 • (a) for any distinct token  $l \in G_{DT}(n)$ ,  $\dot{z}_l > 0$ ;
- 214 • (b) if  $|G_{CT}| = 1$ , then for the single common token  $l \in G_{CT}$ ,  $\dot{z}_l < 0$ .

215 Now we know DTs grow and a single CT will shrink. For multiple CTs to shrink, the condition can  
 216 be a bit involved (see Appendix). The following theorem further shows that the growth rates of DTs  
 217 critically depend on their initial conditions:

218 **Theorem 3** (Growth of distinct tokens). *For a next token  $n$  and its two distinct tokens  $l$  and  $l'$ , the  
 219 dynamics of the **relative gain**  $r_{l/l'|n}(t) := f_{nl}^2(t)/f_{nl'}^2(t) - 1 = \tilde{c}_{l|n}^2(t)/\tilde{c}_{l'|n}^2(t) - 1$  has the following  
 220 analytic form:*

$$r_{l/l'|n}(t) = r_{l/l'|n}(0) e^{2(z_l(t) - z_l(0))} =: r_{l/l'|n}(0) \chi_l(t) \quad (11)$$

221 where  $\chi_l(t) := e^{2(z_l(t) - z_l(0))}$  is the **growth factor** of token  $l$ . If there exist a dominant token  $l_0$  such  
 222 that the initial condition satisfies  $r_{l_0/l|n}(0) > 0$  for all its distinct token  $l \neq l_0$ , and all of its common  
 223 tokens  $l$  satisfy  $\dot{z}_l < 0$ . Then both  $z_{l_0}(t)$  and  $f_{nl_0}(t)$  are monotonously increasing over  $t$ , and

$$e^{2f_{nl_0}^2(0)B_n(t)} \leq \chi_{l_0}(t) \leq e^{2B_n(t)} \quad (12)$$

224 here  $B_n(t) := \eta_Z \int_0^t \xi_n(t') dt'$ . Intuitively, larger  $B_n$  gives larger  $r_{l_0/l|n}$  and sparser attention map.

225 **Self-attention as an algorithm of token scanning.** From Eqn. 11, we could see that self-attention  
 226 performs *token scanning*. To see that, consider the simplest initialization that  $\mathbf{z}(0) = 0$ , which means  
 227 that  $r_{l_0/l|n}(0) = \left(\frac{\mathbb{P}(l_0|m,n)}{\mathbb{P}(l|m,n)}\right)^2 - 1$ . Therefore, distinct token  $l$  with low conditional probability  
 228  $\mathbb{P}(l|m,n)$  will have  $r_{l_0/l|n}(0) \gg 0$ . According Eqn. 12, this leads to quickly growing ratio  $r_{l_0/l|n}(t)$ ,  
 229 which means that the corresponding component  $f_{nl}$  will be quickly dwarfed by the dominating

component  $f_{nl_0}$ . On the other hand, token with high conditional probability  $\mathbb{P}(l|m, n)$  will have smaller  $r_{l_0/l|n}(0)$ , and the ratio  $r_{l_0/l|n}(t)$  grows slower, costing longer time for  $l_0$  to dominate  $l$ .

**Initial value as prior information.** From the theorems, it is clear that the initial value  $r_{l/l'|n}(0) := \left( \frac{\mathbb{P}(l|m, n) \exp(z_l(0))}{\mathbb{P}(l'|m, n) \exp(z_{l'}(0))} \right)^2 - 1$  critically determines the fate of the dynamics. Two tokens  $l$  and  $l'$  with comparable conditional probability  $\mathbb{P}(l|m, n)$  and  $\mathbb{P}(l'|m, n)$  can be suppressed in either way, depending on their initial logits  $z_l(0)$  and  $z_{l'}(0)$ . In the empirical implementation, the initial value of the logits are determined by the inner products of independently initialized high-dimensional vectors, which fluctuate around zero.

The concept of “initial value as prior” can explain many empirical design choices. Under this perspective, *multi-head self-attention* [66] leverages multiple heads to create multiple “trials” of such initialization, which could enable more diverse token combination (e.g., a combination of 1st, 3rd, 5th tokens, rather than a combination of 1st, 2nd, 3rd tokens).

## 6 The Moment of Snapping: When Token Combination is fixed

Theorem 3 suggests two possible fates of the self-attention weights: if  $\xi_n(t)$  decays slowly (e.g.,  $\xi_n(t) \geq 1/t$ ), then all contextual tokens except for the dominant one will drop (i.e.,  $v_{nl} \rightarrow 0$ ) following the ranking order of their conditional probability  $\mathbb{P}(l|m, n)$ . Eventually, winner-takes-all happens. Conversely, if  $\xi_n(t)$  drops so fast that  $B_n(t)$  grows very slowly, or even has an upper limit, then the self-attention patterns are “snapped” and token combination is learned and fixed.

The conclusion is not obvious, since  $\xi_n(t)$  depends on the decay rate of  $\gamma(t)$  and  $\beta_{nn'}(t)$ , which in turns depends on the inner product  $\mathbf{f}_n^\top(t) \mathbf{f}_{n'}(t)$ , which is related to the logit  $z_l$  of the common token  $l$  that also decays over time.

Here we perform a qualitative estimation when there is only a single common token  $l$ . We assume all normalization terms in  $\mathbf{f}_n$  are approximately constant, denoted as  $\rho_0$ , which means that  $\mathbf{f}_n^\top \mathbf{f}_{n'} \approx \exp(2z_l)/\rho_0^2$  and  $\beta_{nn'} \approx E'_{nn'} \approx \mathbf{f}_n^\top \mathbf{f}_{n'} \approx \exp(2z_l)/\rho_0^2$  as well, and  $1 - \mathbf{f}_n^\top \mathbf{f}_{n'} \approx 1$  due to the fact that common token components are small, and will continue to shrink during training.

Under these approximations, its dynamics (Eqn. 10) can be written as follows:

$$\dot{z}_l = \eta_Z \gamma(t) \sum_{n \in \psi^{-1}(m)} f_{nl} \sum_{n' \neq n} \beta_{nn'} (f_{nl}^2 - 1) f_{nl} \approx -K \rho_0^{-4} \eta_Z \gamma(t) e^{4z_l}, \quad \xi_n(t) \approx K \rho_0^{-4} \gamma(t) e^{4z_l} \quad (13)$$

Surprisingly, we now find a *phase transition* by combining the rate change of  $\gamma(t)$  in Theorem 1:

**Theorem 4** (Phase Transition in Training). *If the dynamics of the single common token  $z_l$  satisfies  $\dot{z}_l = -K \rho^{-4} \eta_Z \gamma(t) e^{4z_l}$  and  $\xi_n(t) = K \rho^{-4} \gamma(t) e^{4z_l}$ , then we have:*

$$B_n(t) = \begin{cases} \frac{1}{4} \ln \left( \rho_0^4 / K + \frac{2(M-1)^2}{K M^2} \eta_Y \eta_Z t^2 \right) & t < t'_0 := \frac{K \ln M}{\eta_Y} \\ \frac{1}{4} \ln \left( \rho_0^4 / K + \frac{2K(M-1)^2}{M^2} \frac{\eta_Z}{\eta_Y} \ln^2(M \eta_Y t / K) \right) & t \geq t_0 := \frac{2(1+o(1))K \ln M}{\eta_Y} \end{cases} \quad (14)$$

As a result, there exists a phase transition during training:

- **Attention scanning.** At the beginning of the training,  $\gamma(t) = O(\eta_Y t / K)$  and  $B_n(t) \approx \frac{1}{4} \ln K^{-1} (\rho_0^4 + 2\eta_Y \eta_Z t^2) = O(\ln t)$ . This means that the growth factor for dominant token  $l_0$  is (sub-)linear:  $\chi_{l_0}(t) \geq e^{2f_{nl_0}^{(0)} B_n(t)} \approx [K^{-1} (\rho_0^4 + 2\eta_Y \eta_Z t^2)]^{0.5 f_{nl_0}^{(0)}}$ , and the attention on less co-occurred token drops gradually.
- **Attention snapping.** When  $t \geq t_0 := 2(1 + \delta') K \ln M / \eta_Y$  with  $\delta' = \Theta(\frac{\ln \ln M}{\ln M})$ ,  $\gamma(t) = O\left(\frac{K \ln(\eta_Y t / K)}{\eta_Y t}\right)$  and  $B_n(t) = O(\ln \ln t)$ . Therefore, while  $B_n(t)$  still grows to infinite, the growth factor  $\chi_{l_0}(t) = O(\ln t)$  grows at a much slower logarithmic rate.

This gives a few insights about the training process: **(a)** larger learning rate  $\eta_Y$  of the decoder  $Y$  leads to shorter phase transition time  $t_0 \approx 2K \ln M / \eta_Y$ , **(b)** scaling up both learning rate ( $\eta_Y$  and  $\eta_Z$ ) leads to larger  $B_n(t)$  when  $t \rightarrow +\infty$ , and thus sparser attention maps, and **(c)** given fixed  $\eta_Z$ , small learning rate  $\eta_Y$  leads to larger  $B_n(t)$  when  $t \geq t_0$ , and thus sparser attention map. Fig. 3 shows numerical simulation results of the growth rate  $\chi_l(t)$ . Here we set  $K = 10$  and  $M = 1000$ , and we find smaller  $\eta_Y$  given fixed  $\eta_Z$  indeed leads to later transition and larger  $B_n(t)$  (and  $\chi_l(t)$ ).

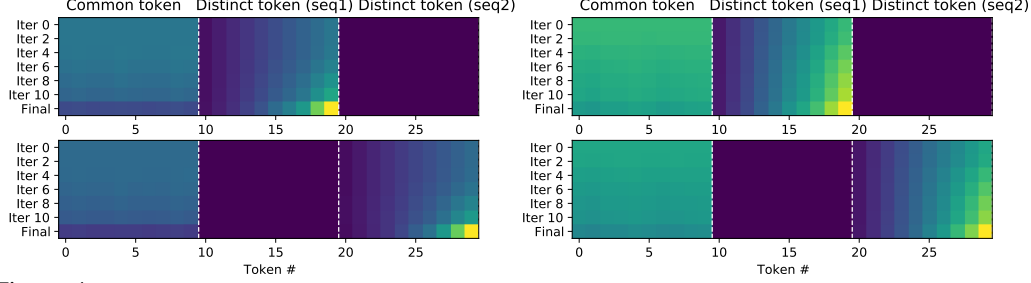

Figure 4: Visualization of  $c_n$  ( $n = 1, 2$ ) in the training dynamics of 1-layer Transformer using SGD on Syn-Small setting. Top row for last token  $n = 1$  and bottom row for last token  $n = 2$ . **Left:** SGD training with  $\eta_Y = \eta_Z = 1$ . Attention pattern  $c_n$  becomes sparse and concentrated on highest  $\mathbb{P}(l|n)$  (rightmost) for each sequence class (Theorem 3). **Right:** SGD training with  $\eta_Y = 10$  and  $\eta_Z = 1$ . With larger  $\eta_Y$ , convergence becomes faster but the final attention maps are less sparse (Sec. 6).

## 7 Discussion and Limitations

**Positional encoding.** While our main analysis does not touch positional encoding, it can be added easily following the relative encoding schemes that adds a linear bias when computing self attention (E.g., T5 [56], ALiBi [53], MusicTransformer [33]). More specifically, the added linear bias  $\exp(z_{ml} + z_0) = \exp(z_{ml})\exp(z_0)$  corresponds to a prior of the contextual token to be learned in the self-attention layer.

**Residue connection.** Residue connection can be added in the formulation, i.e.,  $\hat{u}_T = \text{LN}(\text{LN}(\tilde{u}_T) + u_{x_T})$ , where  $\tilde{u}_T$  is defined in Eqn. 1, and  $\hat{u}_T$  is used instead in the objective (Eqn. 2). In this case, the  $\beta_{nn'}$  in Theorem 1 now is approximately  $\beta_{nn'} \sim v_n^\top v_{n'} + \mathbb{I}(\psi(n) = \psi(n'))$ , which is much larger for sequence classes  $n$  and  $n'$  that share the same last token  $x_T$  than otherwise. In this case, Theorem 1 now gives  $g[i] = \gamma \left( \iota_n v_n - \sum_{n \neq n' \in \psi^{-1}(\psi(n))} \beta_{nn'} v_{n'} \right)$  for  $x_{T+1}[i] = n$ .

Due to the additional constraint  $n' \in \psi^{-1}(\psi(n))$  (i.e.,  $n$  and  $n'$  shares the same last token), we can define *local* distinct and common token to be *within* the sequence class subset  $\psi^{-1}(m)$  and Lemma 2 now applies within each subset. Empirically this makes more sense, since the last token  $x_T = m_1$  or  $m_2$  alone can already separate different subsets  $\psi^{-1}(m_1)$  and  $\psi^{-1}(m_2)$  and there should not be any interactions across the subsets. Here we just present the most straightforward analysis and leave this extension for future work.

## 8 Experiments

We conduct experiments on both synthetic and real-world dataset to verify our theoretical findings.

**Syn-Small.** Following Sec. 3.1, we construct  $K = 2$  sequence classes with vocabulary size  $M = 30$ . The first 10 tokens (0-9) are shared between classes, while the second and third 10 tokens (10-19 and 20-29) are distinct for class 1 and class 2, respectively. The conditional probability  $\mathbb{P}(l|n)$  for token 10-19 is monotonously increasing (same for 20-29). The 1-layer Transformer is parameterized with  $Y$  and  $Z$  (Sec. 3.2), is trained with initial condition  $Y(0) = Z(0) = 0$  plus SGD (with momentum 0.9) using a batchsize 128 and sequence length  $T = 128$  until convergence.

Fig. 4 shows the simulation results that the attention indeed becomes sparse during training, and increasing  $\eta_Y$  leads to faster convergence but less sparse attention. Both are consistent with our theoretical predictions (Theorem 3 and Sec. 6). Interestingly, if we use Adam optimizer instead, self-attention with different learning rate  $\eta_Y = \eta_Z$  picks different subsets of distinct tokens to focus on, showing tune-able inductive bias (Fig. 5). We leave analysis on Adam for future work.

**Syn-Medium.** To further verify our theoretical finding, we now scale up  $K$  to create Syn-Medium and compute how attention sparsity for distinct tokens (in terms of entropy) changes with the learning rates (Fig. 6). We can see indeed the entropy goes down (i.e., attention becomes sparser) with

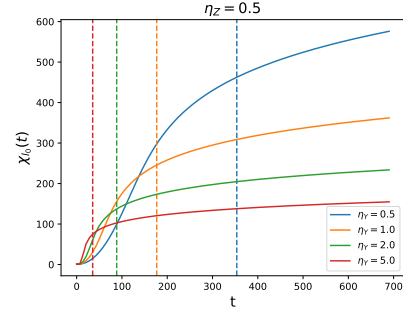

Figure 3: Growth factor  $\chi_l(t)$  (Theorem 3) over time with fixed  $\eta_Z = 0.5$  and changing  $\eta_Y$ . Each solid line is  $\chi_l(t)$  and the dotted line with the same color corresponds to the transition time  $t_0$  for a given  $\eta_Y$ .

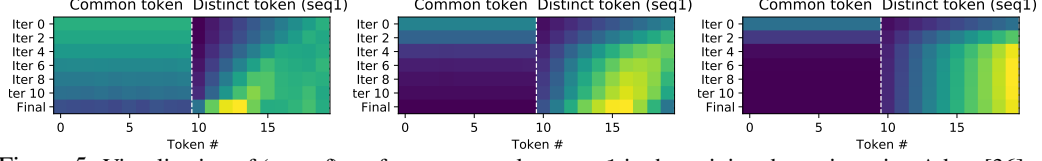

Figure 5: Visualization of (part of)  $c_n$  for sequence class  $n = 1$  in the training dynamics using Adam [36] on Syn-Small setting. **From left to right:**  $\eta_Y = \eta_Z = 0.1, 0.5, 1$ . With different learning rate Adam seems to steer self-attention towards different subset of distinct tokens, showing tune-able inductive bias.

larger  $\eta_Z$ , and goes up (i.e., attention becomes less sparse) by fixing  $\eta_Z$  and increasing  $\eta_Y$  passing the threshold  $\eta_Y/\eta_Z \approx 2$ , consistent with Sec. 6. Note that the threshold is due to the fact that our theory is built on Assumption 1(c), which requires  $\eta_Y$  to be reasonably larger than  $\eta_Z$ .

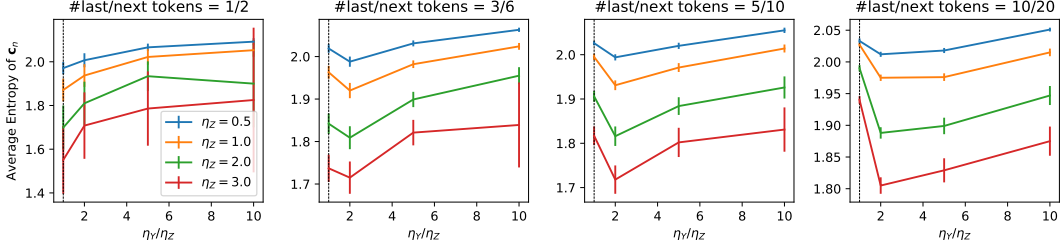

Figure 6: Average entropy of  $c_n$  on distinct tokens versus learning rate ratio  $\eta_Y/\eta_Z$  when number of next tokens  $K$  increases. Each data point is averaged over 10 seeds and standard deviation of the mean is shown.

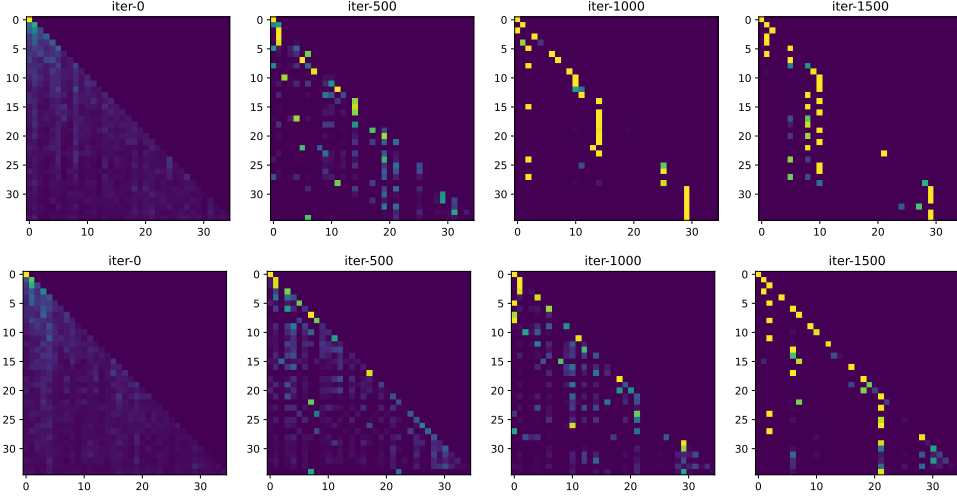

Figure 7: Attention patterns in the lowest self-attention layer for 1-layer (top) and 3-layer (bottom) Transformer trained on WikiText2 using SGD (learning rate is 5). Attention becomes sparse over training.

**Real-world Dataset.** We also test our finding on WikiText [47] using both 1-layer and multi-layer Transformers with regular parameterization that computes  $Y$  and  $Z$  with embedding  $U$ . In both cases, attention of the first layer freeze (and become sparse) at some point (Fig. 7), even if the learning rate remains the same throughout training. More results are in the Appendix.

## 9 Conclusion and Future Work

In this paper, we formally characterize SGD training dynamics of 1-layer Transformer, and find that the dynamics corresponds to a *scan and snap* procedure that progressively puts more attention to key tokens that are distinct and frequently co-occur with the query token in the training set. To our best knowledge, we are the first to analyze the attention dynamics and reveal its inductive bias on data input, and potentially open a new door to understand how Transformer works.

Many future works follow. According to our theory, large dataset suppresses spurious tokens that are perceived as distinct in a small dataset but are actual common ones. Our finding may help suppress such tokens (and spurious correlations) with prior knowledge, without a large amount of data.

## References

- [1] Ekin Akyürek, Dale Schuurmans, Jacob Andreas, Tengyu Ma, and Denny Zhou. What learning algorithm is in-context learning? investigations with linear models. *arXiv preprint arXiv:2211.15661*, 2022.
- [2] Zeyuan Allen-Zhu, Yuanzhi Li, and Zhao Song. A convergence theory for deep learning via over-parameterization. In *International Conference on Machine Learning*, pages 242–252. PMLR, 2019.
- [3] Cem Anil, Yuhuai Wu, Anders Andreassen, Aitor Lewkowycz, Vedant Misra, Vinay Ramasesh, Ambrose Slone, Guy Gur-Ari, Ethan Dyer, and Behnam Neyshabur. Exploring length generalization in large language models. *arXiv preprint arXiv:2207.04901*, 2022.
- [4] Sanjeev Arora, Nadav Cohen, Noah Golowich, and Wei Hu. A convergence analysis of gradient descent for deep linear neural networks. *arXiv preprint arXiv:1810.02281*, 2018.
- [5] Sanjeev Arora, Simon Du, Wei Hu, Zhiyuan Li, and Ruosong Wang. Fine-grained analysis of optimization and generalization for overparameterized two-layer neural networks. In *International Conference on Machine Learning*, pages 322–332. PMLR, 2019.
- [6] Jimmy Lei Ba, Jamie Ryan Kiros, and Geoffrey E Hinton. Layer normalization. *arXiv preprint arXiv:1607.06450*, 2016.
- [7] Alexei Baevski, Wei-Ning Hsu, Qiantong Xu, Arun Babu, Jiatao Gu, and Michael Auli. Data2vec: A general framework for self-supervised learning in speech, vision and language. In *International Conference on Machine Learning*, pages 1298–1312. PMLR, 2022.
- [8] Alexei Baevski, Yuhao Zhou, Abdelrahman Mohamed, and Michael Auli. wav2vec 2.0: A framework for self-supervised learning of speech representations. *Advances in neural information processing systems*, 33:12449–12460, 2020.
- [9] Boaz Barak, Benjamin Edelman, Surbhi Goel, Sham Kakade, Eran Malach, and Cyril Zhang. Hidden progress in deep learning: Sgd learns parities near the computational limit. *Advances in Neural Information Processing Systems*, 35:21750–21764, 2022.
- [10] Peter Bartlett, Dave Helmbold, and Philip Long. Gradient descent with identity initialization efficiently learns positive definite linear transformations by deep residual networks. In *International conference on machine learning*, pages 521–530. PMLR, 2018.
- [11] Satwik Bhattamishra, Kabir Ahuja, and Navin Goyal. On the ability and limitations of transformers to recognize formal languages. *arXiv preprint arXiv:2009.11264*, 2020.
- [12] Satwik Bhattamishra, Arkil Patel, and Navin Goyal. On the computational power of transformers and its implications in sequence modeling. *arXiv preprint arXiv:2006.09286*, 2020.
- [13] Tom Brown, Benjamin Mann, Nick Ryder, Melanie Subbiah, Jared D Kaplan, Prafulla Dhariwal, Arvind Neelakantan, Pranav Shyam, Girish Sastry, Amanda Askell, et al. Language models are few-shot learners. *Advances in neural information processing systems*, 33:1877–1901, 2020.
- [14] Alon Brutzkus and Amir Globerson. Globally optimal gradient descent for a convnet with gaussian inputs. In *International conference on machine learning*, pages 605–614. PMLR, 2017.
- [15] Lenaïc Chizat and Francis Bach. On the global convergence of gradient descent for over-parameterized models using optimal transport. *Advances in neural information processing systems*, 31, 2018.
- [16] Lenaïc Chizat, Edouard Oyallon, and Francis Bach. On lazy training in differentiable programming. *Advances in neural information processing systems*, 32, 2019.
- [17] Aakanksha Chowdhery, Sharan Narang, Jacob Devlin, Maarten Bosma, Gaurav Mishra, Adam Roberts, Paul Barham, Hyung Won Chung, Charles Sutton, Sebastian Gehrmann, et al. Palm: Scaling language modeling with pathways. *arXiv preprint arXiv:2204.02311*, 2022.

- [18] Hyung Won Chung, Le Hou, Shayne Longpre, Barret Zoph, Yi Tay, William Fedus, Eric Li, Xuezhi Wang, Mostafa Dehghani, Siddhartha Brahma, et al. Scaling instruction-finetuned language models. *arXiv preprint arXiv:2210.11416*, 2022.
- [19] Mostafa Dehghani, Stephan Gouws, Oriol Vinyals, Jakob Uszkoreit, and Łukasz Kaiser. Universal transformers. *arXiv preprint arXiv:1807.03819*, 2018.
- [20] Jacob Devlin, Ming-Wei Chang, Kenton Lee, and Kristina Toutanova. Bert: Pre-training of deep bidirectional transformers for language understanding. *arXiv preprint arXiv:1810.04805*, 2018.
- [21] Alexey Dosovitskiy, Lucas Beyer, Alexander Kolesnikov, Dirk Weissenborn, Xiaohua Zhai, Thomas Unterthiner, Mostafa Dehghani, Matthias Minderer, Georg Heigold, Sylvain Gelly, et al. An image is worth 16x16 words: Transformers for image recognition at scale. *arXiv preprint arXiv:2010.11929*, 2020.
- [22] Simon Du, Jason Lee, Haochuan Li, Liwei Wang, and Xiyu Zhai. Gradient descent finds global minima of deep neural networks. In *International conference on machine learning*, pages 1675–1685. PMLR, 2019.
- [23] Simon Du, Jason Lee, Yuandong Tian, Aarti Singh, and Barnabas Poczos. Gradient descent learns one-hidden-layer cnn: Don’t be afraid of spurious local minima. In *International Conference on Machine Learning*, pages 1339–1348. PMLR, 2018.
- [24] Simon S Du, Jason D Lee, and Yuandong Tian. When is a convolutional filter easy to learn? *arXiv preprint arXiv:1709.06129*, 2017.
- [25] Simon S. Du, Xiyu Zhai, Barnabas Poczos, and Aarti Singh. Gradient descent provably optimizes over-parameterized neural networks, 2018.
- [26] Benjamin L Edelman, Surbhi Goel, Sham Kakade, and Cyril Zhang. Inductive biases and variable creation in self-attention mechanisms. In *International Conference on Machine Learning*, pages 5793–5831. PMLR, 2022.
- [27] N Elhage, N Nanda, C Olsson, T Henighan, N Joseph, B Mann, A Askell, Y Bai, A Chen, T Conerly, et al. A mathematical framework for transformer circuits. *Transformer Circuits Thread*, 2021.
- [28] Cong Fang, Jason Lee, Pengkun Yang, and Tong Zhang. Modeling from features: a mean-field framework for over-parameterized deep neural networks. In *Conference on learning theory*, pages 1887–1936. PMLR, 2021.
- [29] Shivam Garg, Dimitris Tsipras, Percy S Liang, and Gregory Valiant. What can transformers learn in-context? a case study of simple function classes. *Advances in Neural Information Processing Systems*, 35:30583–30598, 2022.
- [30] Surbhi Goel, Adam Klivans, and Raghu Meka. Learning one convolutional layer with overlapping patches. In *International Conference on Machine Learning*, pages 1783–1791. PMLR, 2018.
- [31] Kaiming He, Xinlei Chen, Saining Xie, Yanghao Li, Piotr Dollár, and Ross Girshick. Masked autoencoders are scalable vision learners. In *Proceedings of the IEEE/CVF Conference on Computer Vision and Pattern Recognition*, pages 16000–16009, 2022.
- [32] Jiri Hron, Yasaman Bahri, Jascha Sohl-Dickstein, and Roman Novak. Infinite attention: Nngp and ntk for deep attention networks. In *International Conference on Machine Learning*, pages 4376–4386. PMLR, 2020.
- [33] Cheng-Zhi Anna Huang, Ashish Vaswani, Jakob Uszkoreit, Noam Shazeer, Ian Simon, Curtis Hawthorne, Andrew M Dai, Matthew D Hoffman, Monica Dinculescu, and Douglas Eck. Music transformer. *arXiv preprint arXiv:1809.04281*, 2018.
- [34] Arthur Jacot, Franck Gabriel, and Clément Hongler. Neural tangent kernel: Convergence and generalization in neural networks. *Advances in neural information processing systems*, 31, 2018.

- [35] Samy Jelassi, Michael Sander, and Yuanzhi Li. Vision transformers provably learn spatial structure. *Advances in Neural Information Processing Systems*, 35:37822–37836, 2022.
- [36] Diederik P Kingma and Jimmy Ba. Adam: A method for stochastic optimization. *arXiv preprint arXiv:1412.6980*, 2014.
- [37] Nikita Kitaev, Łukasz Kaiser, and Anselm Levskaya. Reformer: The efficient transformer. *ICLR*, 2020.
- [38] Shuai Li, Zhao Song, Yu Xia, Tong Yu, and Tianyi Zhou. The closeness of in-context learning and weight shifting for softmax regression. *arXiv preprint arXiv:2304.13276*, 2023.
- [39] Yuanzhi Li and Yingyu Liang. Learning overparameterized neural networks via stochastic gradient descent on structured data. *Advances in neural information processing systems*, 31, 2018.
- [40] Yuchen Li, Yuanzhi Li, and Andrej Risteski. How do transformers learn topic structure: Towards a mechanistic understanding. *arXiv preprint arXiv:2303.04245*, 2023.
- [41] Valerii Likhoshesterov, Krzysztof Choromanski, and Adrian Weller. On the expressive power of self-attention matrices. *arXiv preprint arXiv:2106.03764*, 2021.
- [42] Tianyi Liu, Minshuo Chen, Mo Zhou, Simon S Du, Enlu Zhou, and Tuo Zhao. Towards understanding the importance of shortcut connections in residual networks. *Advances in neural information processing systems*, 32, 2019.
- [43] Ze Liu, Yutong Lin, Yue Cao, Han Hu, Yixuan Wei, Zheng Zhang, Stephen Lin, and Baining Guo. Swin transformer: Hierarchical vision transformer using shifted windows. In *Proceedings of the IEEE/CVF international conference on computer vision*, pages 10012–10022, 2021.
- [44] Ilya Loshchilov and Frank Hutter. Decoupled weight decay regularization. *arXiv preprint arXiv:1711.05101*, 2017.
- [45] Yiping Lu, Chao Ma, Yulong Lu, Jianfeng Lu, and Lexing Ying. A mean field analysis of deep resnet and beyond: Towards provably optimization via overparameterization from depth. In *International Conference on Machine Learning*, pages 6426–6436. PMLR, 2020.
- [46] Song Mei, Andrea Montanari, and Phan-Minh Nguyen. A mean field view of the landscape of two-layer neural networks. *Proceedings of the National Academy of Sciences*, 115(33):E7665–E7671, 2018.
- [47] Stephen Merity, Caiming Xiong, James Bradbury, and Richard Socher. Pointer sentinel mixture models. *arXiv preprint arXiv:1609.07843*, 2016.
- [48] Phan-Minh Nguyen and Huy Tuan Pham. A rigorous framework for the mean field limit of multilayer neural networks. *arXiv preprint arXiv:2001.11443*, 2020.
- [49] Catherine Olsson, Nelson Elhage, Neel Nanda, Nicholas Joseph, Nova DasSarma, Tom Henighan, Ben Mann, Amanda Askell, Yuntao Bai, Anna Chen, et al. In-context learning and induction heads. *arXiv preprint arXiv:2209.11895*, 2022.
- [50] OpenAI. Gpt-4 technical report, 2023.
- [51] Samet Oymak and Mahdi Soltanolkotabi. Toward moderate overparameterization: Global convergence guarantees for training shallow neural networks. *IEEE Journal on Selected Areas in Information Theory*, 1(1):84–105, 2020.
- [52] Jorge Pérez, Pablo Barceló, and Javier Marinkovic. Attention is turing complete. *The Journal of Machine Learning Research*, 22(1):3463–3497, 2021.
- [53] Ofir Press, Noah A Smith, and Mike Lewis. Train short, test long: Attention with linear biases enables input length extrapolation. *arXiv preprint arXiv:2108.12409*, 2021.

- [54] Alec Radford, Jong Wook Kim, Chris Hallacy, Aditya Ramesh, Gabriel Goh, Sandhini Agarwal, Girish Sastry, Amanda Askell, Pamela Mishkin, Jack Clark, et al. Learning transferable visual models from natural language supervision. In *International conference on machine learning*, pages 8748–8763. PMLR, 2021.
- [55] Alec Radford, Jeffrey Wu, Rewon Child, David Luan, Dario Amodei, Ilya Sutskever, et al. Language models are unsupervised multitask learners. *OpenAI blog*, 1(8):9, 2019.
- [56] Colin Raffel, Noam Shazeer, Adam Roberts, Katherine Lee, Sharan Narang, Michael Matena, Yanqi Zhou, Wei Li, and Peter J Liu. Exploring the limits of transfer learning with a unified text-to-text transformer. *The Journal of Machine Learning Research*, 21(1):5485–5551, 2020.
- [57] Noam Shazeer and Mitchell Stern. Adafactor: Adaptive learning rates with sublinear memory cost. In *International Conference on Machine Learning*, pages 4596–4604. PMLR, 2018.
- [58] Sam Shleifer, Jason Weston, and Myle Ott. Normformer: Improved transformer pretraining with extra normalization. *arXiv preprint arXiv:2110.09456*, 2021.
- [59] Charlie Snell, Ruiqi Zhong, Dan Klein, and Jacob Steinhardt. Approximating how single head attention learns. *arXiv preprint arXiv:2103.07601*, 2021.
- [60] Mahdi Soltanolkotabi. Learning relus via gradient descent. *Advances in neural information processing systems*, 30, 2017.
- [61] Nisan Stiennon, Long Ouyang, Jeffrey Wu, Daniel Ziegler, Ryan Lowe, Chelsea Voss, Alec Radford, Dario Amodei, and Paul F Christiano. Learning to summarize with human feedback. *Advances in Neural Information Processing Systems*, 33:3008–3021, 2020.
- [62] Yi Tay, Mostafa Dehghani, Vinh Q Tran, Xavier Garcia, Jason Wei, Xuezhi Wang, Hyung Won Chung, Dara Bahri, Tal Schuster, Steven Zheng, et al. U12: Unifying language learning paradigms. In *The Eleventh International Conference on Learning Representations*, 2022.
- [63] Yuandong Tian. An analytical formula of population gradient for two-layered relu network and its applications in convergence and critical point analysis. In *International conference on machine learning*, pages 3404–3413. PMLR, 2017.
- [64] Yuandong Tian. Understanding deep contrastive learning via coordinate-wise optimization. In *Advances in Neural Information Processing Systems*, 2022.
- [65] Yuandong Tian. Understanding the role of nonlinearity in training dynamics of contrastive learning. *ICLR*, 2023.
- [66] Ashish Vaswani, Noam Shazeer, Niki Parmar, Jakob Uszkoreit, Llion Jones, Aidan N. Gomez, Lukasz Kaiser, and Illia Polosukhin. Attention is all you need. 2017.
- [67] Colin Wei, Yining Chen, and Tengyu Ma. Statistically meaningful approximation: a case study on approximating turing machines with transformers. *Advances in Neural Information Processing Systems*, 35:12071–12083, 2022.
- [68] Weihang Xu and Simon S Du. Over-parameterization exponentially slows down gradient descent for learning a single neuron. *arXiv preprint arXiv:2302.10034*, 2023.
- [69] Greg Yang, Edward J Hu, Igor Babuschkin, Szymon Sidor, Xiaodong Liu, David Farhi, Nick Ryder, Jakub Pachocki, Weizhu Chen, and Jianfeng Gao. Tensor programs v: Tuning large neural networks via zero-shot hyperparameter transfer. *arXiv preprint arXiv:2203.03466*, 2022.
- [70] Shunyu Yao, Binghui Peng, Christos Papadimitriou, and Karthik Narasimhan. Self-attention networks can process bounded hierarchical languages. *arXiv preprint arXiv:2105.11115*, 2021.
- [71] Ching-Feng Yeh, Jay Mahadeokar, Kaustubh Kalgaonkar, Yongqiang Wang, Duc Le, Mahaveer Jain, Kjell Schubert, Christian Fuegen, and Michael L Seltzer. Transformer-transducer: End-to-end speech recognition with self-attention. *arXiv preprint arXiv:1910.12977*, 2019.
- [72] Chulhee Yun, Srinadh Bhojanapalli, Ankit Singh Rawat, Sashank J Reddi, and Sanjiv Kumar. Are transformers universal approximators of sequence-to-sequence functions? *arXiv preprint arXiv:1912.10077*, 2019.

- 518 [73] Jingzhao Zhang, Sai Praneeth Karimireddy, Andreas Veit, Seungyeon Kim, Sashank Reddi,  
519 Sanjiv Kumar, and Suvrit Sra. Why are adaptive methods good for attention models? *Advances*  
520 *in Neural Information Processing Systems*, 33:15383–15393, 2020.
- 521 [74] Susan Zhang, Stephen Roller, Naman Goyal, Mikel Artetxe, Moya Chen, Shuohui Chen,  
522 Christopher Dewan, Mona Diab, Xian Li, Xi Victoria Lin, et al. Opt: Open pre-trained trans-  
523 former language models. *arXiv preprint arXiv:2205.01068*, 2022.
- 524 [75] Haoyu Zhao, Abhishek Panigrahi, Rong Ge, and Sanjeev Arora. Do transformers parse while  
525 predicting the masked word? *arXiv preprint arXiv:2303.08117*, 2023.
- 526 [76] Mo Zhou, Tianyi Liu, Yan Li, Dachao Lin, Enlu Zhou, and Tuo Zhao. Toward understanding  
527 the importance of noise in training neural networks. In *International Conference on Machine*  
528 *Learning*, pages 7594–7602. PMLR, 2019.
- 529 [77] Difan Zou, Yuan Cao, Dongruo Zhou, and Quanquan Gu. Gradient descent optimizes over-  
530 parameterized deep relu networks. *Machine learning*, 109:467–492, 2020.

## A Proof of Section 3

**Lemma 1** (Dynamics of 1-layer Transformer). *The gradient dynamics of Eqn. 2 with batchsize 1 is:*

$$\dot{Y} = \eta_Y \text{LN}(X^\top \mathbf{b}_T)(\mathbf{x}_{T+1} - \boldsymbol{\alpha})^\top, \quad \dot{Z} = \eta_Z \mathbf{x}_T(\mathbf{x}_{T+1} - \boldsymbol{\alpha})^\top Y^\top \frac{P_{X^\top \mathbf{b}_T}^\perp}{\|X^\top \mathbf{b}_T\|_2} X^\top \text{diag}(\mathbf{b}_T) X \quad (3)$$

Here  $P_v^\perp := I - \mathbf{v}\mathbf{v}^\top / \|\mathbf{v}\|_2^2$  projects a vector into  $\mathbf{v}$ 's orthogonal complementary space,  $\eta_Y$  and  $\eta_Z$  are the learning rates for the decoder layer  $Y$  and self-attention layer  $Z$ ,  $\boldsymbol{\alpha} := [\alpha_1, \dots, \alpha_M]^\top \in \mathbb{R}^M$  and  $\alpha_m := \exp(Y^\top \text{LN}(X^\top \mathbf{b}_T)) / \mathbf{1}^\top \exp(Y^\top \text{LN}(X^\top \mathbf{b}_T))$ .

*Proof.* With the reparameterization of  $Y$  and  $Z$ , the loss function is the following:

$$J(Y, Z) = \mathbb{E}_{\mathcal{D}} [\mathbf{x}_{T+1}^\top Y^\top \text{LN}(X^\top \mathbf{b}_T) - \log(\mathbf{1}^\top \exp(Y^\top X^\top \text{LN}(\mathbf{b}_T)))] \quad (15)$$

and

$$\alpha_m = \frac{\exp(\mathbf{e}_m^\top Y^\top \text{LN}(X^\top \mathbf{b}_T))}{\mathbf{1}^\top \exp(Y^\top \text{LN}(X^\top \mathbf{b}_T))} \quad (16)$$

Therefore, taking matrix differentials, we have:

$$dJ = (\mathbf{x}_{T+1} - \boldsymbol{\alpha})^\top d(Y^\top \text{LN}(X^\top \mathbf{b})) = (\mathbf{x}_{T+1} - \boldsymbol{\alpha})^\top \left( dY^\top \text{LN}(X^\top \mathbf{b}) + Y^\top \frac{P_{X^\top \mathbf{b}}^\perp}{\|X^\top \mathbf{b}\|} X^\top d\mathbf{b} \right) \quad (17)$$

since in general we have  $d(\exp(\mathbf{a}) / \mathbf{1}^\top \exp(\mathbf{a})) = L d\mathbf{a}$  with  $L := \text{diag}(\mathbf{b}) - \mathbf{b}\mathbf{b}^\top$ , let  $\mathbf{a} := XZ^\top \mathbf{x}_T$  and we have:

$$dJ = (\mathbf{x}_{T+1} - \boldsymbol{\alpha})^\top \left( dY^\top \text{LN}(X^\top \mathbf{b}) + Y^\top \frac{P_{X^\top \mathbf{b}}^\perp}{\|X^\top \mathbf{b}\|} X^\top L d(XZ^\top \mathbf{x}_T) \right) \quad (18)$$

$$= (\mathbf{x}_{T+1} - \boldsymbol{\alpha})^\top \left( dY^\top \text{LN}(X^\top \mathbf{b}) + Y^\top \frac{P_{X^\top \mathbf{b}}^\perp}{\|X^\top \mathbf{b}\|} X^\top L X dZ^\top \mathbf{x}_T \right) \quad (19)$$

Finally notice that  $P_{X^\top \mathbf{b}}^\perp X^\top L = P_{X^\top \mathbf{b}}^\perp X^\top \text{diag}(\mathbf{b})$  due to the fact that  $P_v^\perp \mathbf{v} = 0$  and the conclusion follows.  $\square$

**Lemma 2.** *Given the event  $\{x_T = m, x_{T+1} = n\}$ , when  $T \rightarrow +\infty$ , we have*

$$X^\top \mathbf{b}_T \rightarrow \mathbf{c}_{m,n}, \quad X^\top \text{diag}(\mathbf{b}_T) X \rightarrow \text{diag}(\mathbf{c}_{m,n}) \quad (6)$$

where  $\mathbf{c}_{m,n} = [c_{1|m,n}, c_{2|m,n}, \dots, c_{M|m,n}]^\top \in \mathbb{R}^M$ . Note that  $\mathbf{c}_{m,n}^\top \mathbf{1} = 1$ .

*Proof.* Let  $\mathbf{p} = [\exp(z_{m1}), \dots, \exp(z_{mM})]^\top \in \mathbb{R}^M$ ,  $p_{x_t} := \exp(z_{mx_t})$ , and  $\mathbf{p}_X := [\exp(z_{mx_1}), \dots, \exp(z_{mx_{T-1}})]^\top$ , then for any  $T$  we have

$$X^\top \mathbf{b}_T = \sum_{t=1}^{T-1} b_{tT} \mathbf{x}_t = \sum_{t=1}^{T-1} \frac{p_{x_t} \mathbf{x}_t}{\sum_{t'} p_{x_{t'}}} = \frac{X^\top \mathbf{p}_X}{\mathbf{1}^\top X^\top \mathbf{p}_X} \quad (20)$$

Combining Lemma 18 and the definition of  $c_{l|m,n}$  (Eqn. 5), we have that when  $T \rightarrow +\infty$ ,

$$X^\top \mathbf{b}_T \rightarrow \sum_{l=1}^M \frac{\mathbb{P}(l|m,n) \exp(z_{ml}) \mathbf{e}_l}{\sum_{l'} \mathbb{P}(l'|m,n) \exp(z_{ml'})} = \mathbf{c}_{m,n} \quad (21)$$

Similarly:

$$X^\top \text{diag}(\mathbf{b}_T) X = \frac{X^\top \text{diag}(\mathbf{p}_X) X}{\mathbf{1}^\top X^\top \mathbf{p}_X} \quad (22)$$

Let  $T \rightarrow +\infty$ , then we also get

$$X^\top \text{diag}(\mathbf{b}_T) X \rightarrow \text{diag}(\mathbf{c}_{m,n}) \quad (23)$$

550  $\square$

## B Proof of Section 4

### B.1 Notation

For convenience, we introduce the following notations for this section:

- Denote  $E' := (I + E)^{-1} - I$ .
- Apply orthogonal diagonalization on  $E$  and obtain  $E = U^\top D U$  where  $U := [\mathbf{u}_1, \dots, \mathbf{u}_K] \in O_{K \times K}$ ,  $D = \text{diag}(\lambda_1, \dots, \lambda_K)$  and  $|\lambda_1| \geq \dots \geq |\lambda_K| \geq 0$ .
- Denote  $F' := [F, F^\circ] \in \mathbb{R}^{M \times M}$  where  $F^\circ \in \mathbb{R}^{M \times (M-K)}$  is some matrix such that  $\text{rank}(F') = M$ . This is possible since  $\{\mathbf{f}_i\}_{i \in [K]}$  are linear-independent.
- Denote  $W' := (F')^\top Y = [F, F^\circ]^\top Y = [W^\top, Y^\top F^\circ]^\top = [\mathbf{w}_1, \dots, \mathbf{w}_K, \mathbf{w}_{K+1}, \dots, \mathbf{w}_M]^\top \in \mathbb{R}^{M \times M}$ .
- Denote  $\zeta_n := \frac{M}{M-1}(\mathbf{e}_n - \frac{1}{M}\mathbf{1}) \in \mathbb{R}^M$ .
- Denote  $q_1 := \zeta_i^\top \zeta_i = 1 + \frac{1}{M-1}$ ,  $q_0 := \zeta_j^\top \zeta_i = -\frac{M}{(M-1)^2}$  where  $i, j \in [M], i \neq j$ .
- Denote  $h$  to be a continuous function that satisfies  $h(0) = 0$  and  $\dot{h} = \eta_Y \cdot (M-1 + \exp(Mh))^{-1}$ . Details in Lemma 6.
- Denote  $\omega_1$  to be the constant defined in Lemma 8 that satisfies  $\omega_1 = \Theta(\frac{\ln \ln(M)}{\ln(M)})$ .
- Denote  $N_n := \sum_{i=1}^N \mathbb{I}[x_{T+1} = n]$  to be the number of times the event  $x_{T+1} = n$  happens.
- Denote  $\bar{N} := \lceil N/K \rceil$  to be the average value of  $N_n$  when  $\mathbb{P}(n) \equiv 1/K$  and  $\Delta := \lceil \sqrt{N \ln(\frac{1}{\delta})} \rceil$  to be the radius of confidence interval centered on  $\bar{N}$  with confidence  $1 - \delta$ . Here  $\Delta/\bar{N} \asymp \frac{K}{\sqrt{N}} \sqrt{\ln(\frac{1}{\delta})} \ll 1$  since  $N \gg K^2$ . Details in Lemma 10 and Remark 4.
- Denote  $\bar{W}'(N) := [\bar{\mathbf{w}}_1(N), \dots, \bar{\mathbf{w}}_K(N), \mathbf{0}, \dots, \mathbf{0}]^\top \in \mathbb{R}^{M \times M}$ , where  $\bar{\mathbf{w}}_n(N) := (M-1)h(\bar{N})\zeta_n$ ,  $\forall n \in [K]$ .

### B.2 Proof of Lemma 3

We assume  $\cup_{m \in [M]} \psi^{-1}(m) = [K]$  for convenience, but we claim that our proof can be easily generalized into the case where  $\Omega \neq [K]$  by reordering the subscript of the vectors. First, we prove the dynamics equation of the reparameterized dynamics of  $Y$ .

**Lemma 3.** *Given  $x_{T+1} = n$ , the dynamics of  $W$  is (here  $\alpha_j = \exp(\mathbf{w}_j)/\mathbf{1}^\top \exp(\mathbf{w}_j)$ ):*

$$\dot{\mathbf{w}}_j = \eta_Y \mathbb{I}(j = n)(\mathbf{e}_n - \alpha_n) \quad (8)$$

While we cannot run gradient update on  $W$  directly, it can be achieved by modifying the gradient of  $Y$  to be  $\dot{Y} = \eta_Y(\mathbf{f}_n - F'E_n)(\mathbf{e}_n - \alpha_n)^\top$ . If  $\lambda_1$  is small, the modification is small as well.

*Proof.* We let  $F' := [F, F^\circ] \in \mathbb{R}^{M \times M}$  where  $\text{rank}(F') = M$ , this is possible since  $\{\mathbf{f}_n\}_{n \in [K]}$  are linear-independent. And we further define  $W' := (F')^\top Y = [F, F^\circ]^\top Y = [W^\top, Y^\top F^\circ]^\top = [\mathbf{w}_1, \dots, \mathbf{w}_K, \mathbf{w}_{K+1}, \dots, \mathbf{w}_M]^\top \in \mathbb{R}^{M \times M}$ . When given  $x_{T+1} = n$ , the first term of the differential of loss function  $J$  is:

$$\begin{aligned} \text{tr} \left( dY^\top \frac{X^\top \mathbf{b}_T}{\|X^\top \mathbf{b}_T\|_2} (x_{T+1} - \alpha)^\top \right) &= \text{tr}(dY^\top F'(F')^{-1} \mathbf{f}_n (x_{T+1} - \alpha)^\top) \\ &= \text{tr}(d(W')^\top \mathbf{e}_n (x_{T+1} - \alpha)^\top) \end{aligned} \quad (24)$$

So  $\dot{W}' = \mathbf{e}_n (x_{T+1} - \alpha)^\top$ . This nice property will limit  $W$  to independently update its  $n$ -th row for any  $x_{T+1} = n \in [K]$ , and the last  $M-K$  rows of  $W'$  are not updated. Similarly for  $\alpha$  we have

$$\alpha = \frac{\exp(UW_V \tilde{\mathbf{u}}_T)}{\mathbf{1}^\top \exp(UW_V \tilde{\mathbf{u}}_T)} = \frac{\exp(Y^\top \mathbf{f}_n)}{\mathbf{1}^\top \exp(Y^\top \mathbf{f}_n)} = \frac{\exp(Y^\top F'(F')^{-1} \mathbf{f}_n)}{\mathbf{1}^\top \exp(Y^\top F'(F')^{-1} \mathbf{f}_n)} = \frac{\exp(\mathbf{w}_n)}{\mathbf{1}^\top \exp(\mathbf{w}_n)} \quad (25)$$

We get Eqn. 8 by combining the above results.

586 If we don't run gradient update on  $W$  directly, we can run a modified gradient update on  $Y$ :

$$\dot{Y} = \eta_Y (\mathbf{f}_n - FE' \mathbf{e}_n) (\mathbf{e}_n - \boldsymbol{\alpha}_n)^\top \quad (26)$$

587 This will lead to (note that  $F$  does not change over time due to Assumption 1 (c)):

$$\dot{W} = F^\top \dot{Y} = \eta_Y F^\top (\mathbf{f}_n - FE' \mathbf{e}_n) (\mathbf{e}_n - \boldsymbol{\alpha}_n)^\top \quad (27)$$

$$= \eta_Y [F^\top \mathbf{f}_n - F^\top F(I - (I + E)^{-1}) \mathbf{e}_n] (\mathbf{e}_n - \boldsymbol{\alpha}_n)^\top \quad (28)$$

$$= \eta_Y (F^\top \mathbf{f}_n - F^\top F \mathbf{e}_n + \mathbf{e}_n) (\mathbf{e}_n - \boldsymbol{\alpha}_n)^\top \quad (29)$$

$$= \eta_Y \mathbf{e}_n (\mathbf{e}_n - \boldsymbol{\alpha}_n)^\top \quad (30)$$

588 By Lemma 17, we know that if  $\lambda_1$  is small, so does  $\max_{i \in [K]} |\lambda_i(E')|$  and thus the modification is  
 589 small as well. In Lemma 5 Remark 1, we will show that the additional term  $-FE' \mathbf{e}_n$  effectively  
 590 reduces the learning rate, if all off-diagonal elements of  $E$  are the same.  $\square$

591 Lemma 3 shows that we can transfer the problem into solving  $K$  independent and similar non-linear  
 592 ODE. And we then show that such a problem can be well solved by following Lemma. Recall that  
 593  $\boldsymbol{\zeta}_n := \frac{M}{M-1} (\mathbf{e}_n - \frac{1}{M} \mathbf{1}) \in \mathbb{R}^M$ , we have:

594 **Lemma 5.** Assume  $Y$  is initialized to be a zero matrix,  $Z$  is fixed, and the learning rate of  $Y$  is  $\eta_Y$ .  
 595 Then if event  $x_{T+1} = n$  always holds at  $s$  step ( $s \geq 1$ ) we have

$$\mathbf{w}_n(s) = (M-1)h^*(s)\boldsymbol{\zeta}_n \quad (31)$$

596

$$\alpha_{nj}(s) = \begin{cases} \frac{\exp(Mh^*(s-1))}{(M-1) + \exp(Mh^*(s-1))} & , \quad j = n \\ \frac{1}{(M-1) + \exp(Mh^*(s-1))} & , \quad j \neq n \end{cases} \quad (32)$$

597 And thus  $\mathbf{e}_n - \boldsymbol{\alpha}_n(s) = \frac{M-1}{M-1 + \exp(Mh^*(s-1))} \boldsymbol{\zeta}_n$ . Here  $h^*(s)$  satisfies:

$$h^*(s) = \begin{cases} h^*(s-1) + \frac{\eta_Y}{(M-1) + \exp(Mh^*(s-1))} & , \quad s \geq 1 \\ 0 & , \quad s = 0 \end{cases} \quad (33)$$

598 *Proof.* We prove this Lemma by induction.

599 **Step 1:** Note that  $Y$  is initialized to be a zero matrix, then  $\mathbf{w}_i(0) = 0, \forall i \in [K]$ . So we have

$$\alpha_n(1) = \frac{1}{M}, \quad \forall j \in [K] \quad (34)$$

$$\dot{w}_{nj}(1) = \begin{cases} 1 - \frac{1}{M}, & j = n \\ -\frac{1}{M}, & j \neq n \end{cases} \quad (35)$$

$$w_{nj}(1) = \begin{cases} \eta_Y(1 - \frac{1}{M}), & j = n \\ -\frac{\eta_Y}{M}, & j \neq n \end{cases} \quad (36)$$

600 It's easy to check that these equations match that of Lemma 5.

601 **Step  $s$ :** Assume the equations of Lemma 5 hold for step  $s - 1$ . Then at the  $s$  step, we have

$$\alpha_{nj}(s) = \begin{cases} \frac{\exp((M-1)h^*(s-1))}{\exp((M-1)h^*(s-1)) + (M-1)\exp(-h^*(s-1))} = \frac{\exp(Mh^*(s-1))}{\exp(Mh^*(s-1)) + (M-1)}, & j = n \\ \frac{\exp(-h^*(s-1))}{\exp((M-1)h^*(s-1)) + (M-1)\exp(-h^*(s-1))} = \frac{1}{\exp(Mh^*(s-1)) + (M-1)}, & j \neq n \end{cases} \quad (37)$$

$$\dot{w}_{nj}(s) = \begin{cases} \frac{M-1}{\exp(Mh^*(s-1)) + (M-1)}, & j = n \\ -\frac{1}{\exp(Mh^*(s-1)) + (M-1)}, & j \neq n \end{cases} \quad (38)$$

$$w_{nj}(s) = \begin{cases} (M-1) \cdot \left( \frac{\eta_Y}{\exp(Mh^*(s-1)) + (M-1)} + h^*(s-1) \right) = (M-1)h^*(s), & j = n \\ -\left( \frac{\eta_Y}{\exp(Mh^*(s-1)) + (M-1)} + h^*(s-1) \right) = -h^*(s), & j \neq n \end{cases} \quad (39)$$

602 And the equations of Lemma 5 also hold for step  $s$ . So we finish the proof.  $\square$

603 **Remark 1.** If we following the original dynamics (Eqn. 7), then it corresponds to the  $W$  dynamics  
604 as follows:

$$\dot{W} = \eta_Y(\mathbf{e}_n + (I + E)E'\mathbf{e}_n)(\mathbf{e}_n - \boldsymbol{\alpha}_n)^\top = \eta_Y F^\top \mathbf{f}_n(\mathbf{e}_n - \boldsymbol{\alpha}_n)^\top \quad (40)$$

605 When all off-diagonal elements of  $E$  are identical, i.e.,  $\mathbf{f}_n^\top \mathbf{f}_{n'} = \rho$  for  $n \neq n'$ , then  $0 \leq \rho \leq 1$  and  
606 we have

$$\dot{w}_n = \eta_Y(\mathbf{e}_n - \boldsymbol{\alpha}_n)^\top \quad (41)$$

$$\dot{w}_j = \eta_Y \rho(\mathbf{e}_n - \boldsymbol{\alpha}_n)^\top, \quad j \neq n \quad (42)$$

607 So if different sequence classes are sampled uniformly, then by similar induction argument, we will  
608 have

$$w_n(N) = (M-1)h^*(N/K) \left[ \zeta_n + \rho \sum_{n' \neq n} \zeta_{n'} \right] = (1-\rho)(M-1)h^*(N/K)\zeta_n \quad (43)$$

609 where the last equation is due to the fact that  $\sum_n \zeta_n = \frac{M}{M-1} \sum_n (\mathbf{e}_n - \frac{1}{M}\mathbf{1}) = \frac{M}{M-1}(\mathbf{1} - \mathbf{1}) = 0$ .

610 This means that  $\sum_{n' \neq n} \zeta_{n'} = -\zeta_n$ . Therefore, the effective learning rate is  $\eta_Y' := (1-\rho)\eta_Y \leq \eta_Y$ .

### 611 B.3 Property of $h^*(s)$ and its continuous counterpart.

612 Before further investigation on  $Y$ , we need to get some basic properties of  $h^*$ , in particular, how fast  
613 it grows over time. First, if we consider the continuous version of  $h^*$ , namely  $h$ , then we can directly  
614 obtain the equation that  $h$  needs to satisfy by integrating the corresponding differential equation.

615 **Lemma 6.** If we consider the continuous version of  $h^*(s)$ , namely  $h$ , as the following ODE:

$$\frac{dh}{dt} = \frac{\eta_Y}{(M-1) + \exp(Mh)} \quad (44)$$

616 and assume  $h(0) = 0$ , then we have

$$\exp(Mh(t)) + (M-1)Mh(t) = M\eta_Y t + 1 \quad (45)$$

617

$\square$

618 Then we will show that the  $h$  is actually almost the same as the original step function  $h^*$ .

619 **Lemma 7.** For  $h$  and  $h^*$  we have:

- 620 • (a) For any  $s \in \mathbb{N}$ ,  $0 \leq h^*(s) - h(s) \leq \frac{2\eta_Y}{M}$ . Then there exists some constant  $c = \Theta(1)$   
621 such that for any  $s \leq \ln(M)/\eta_Y$ ,  $h(s+c) \geq h^*(s) \geq h(s)$ .
- 622 • (b)  $h^*(s) - h(s) \rightarrow 0$  when  $s \rightarrow +\infty$ .

623 *Proof. (a)* First we show that  $h^*(s) \geq h(s)$  for all  $s \in \mathbb{N}$ , and the convex packet function of  $h^*$  can  
 624 almost control the upper bound of  $h$ . Define  $h^\circ : \mathbb{R}^+ \rightarrow \mathbb{R}^+$  as follows:

$$h^\circ(t) := (t - \lfloor t \rfloor) \cdot [h^*(\lceil t \rceil) - h^*(\lfloor t \rfloor)] + h^*(\lfloor t \rfloor), \quad \forall t \in \mathbb{R}^+ \quad (46)$$

625 Here  $\lceil \cdot \rceil$  and  $\lfloor \cdot \rfloor$  mean ceil function and floor function, respectively. It's clear that  $h^\circ$  is a strictly  
 626 monotonically increasing function, and for any  $s \in \mathbb{N}$ ,  $h^\circ(s) = h^*(s)$ , while for any  $t \notin \mathbb{N}$ ,  
 627  $(t, h^\circ(t))$  lies on the line connecting point  $(\lfloor t \rfloor, h^*(\lfloor t \rfloor))$  and point  $(\lceil t \rceil, h^*(\lceil t \rceil))$ . To prevent ambi-  
 628 guity, we let  $\dot{h}^\circ(t)$  to be the left limit of  $h^\circ$ , i.e.,  $\dot{h}^\circ(t) = \lim_{t' \rightarrow t-} h^\circ(t')$ .

629 We claim  $h(t) \leq h^\circ(t)$ ,  $\forall t \in \mathbb{R}^+$ . We prove it by induction. First when  $t = 0$ , we have  $h^\circ(0) =$   
 630  $h^*(0) = h(0) = 0$ . Then we assume  $h(t') \leq h^\circ(t')$  hold for time  $t' \leq t \in \mathbb{N}$  and prove that  
 631  $h(t') \leq h^\circ(t')$  hold for  $t' \in (t, t+1]$ . If this is not true, then from the continuity of  $h^\circ$  and  $h$ , we  
 632 know it must exist  $t'' \in (t, t+1]$  such that  $h(t'') \geq h^\circ(t'')$  and  $\dot{h}(t'') > \dot{h}^\circ(t'')$ . The later condition  
 633 results that  $\eta_Y[M-1 + \exp(Mh(t''))]^{-1} > \eta_Y[M-1 + \exp(Mh^*(\lfloor t'' \rfloor))]^{-1}$ . So

$$h(t'') < h^*(\lfloor t'' \rfloor) = h^\circ(\lfloor t'' \rfloor) \leq h^\circ(t'') \quad (47)$$

634 This contradicts the hypothesis  $h(t'') \geq h^\circ(t'')$ . So  $h(t') \leq h^\circ(t')$  hold for  $t' \in (t, t+1]$  and thus  
 635 for all  $t \in \mathbb{R}^+$ . Hence for any  $s \in \mathbb{N}$ , we have  $h(s) \leq h^\circ(s) = h^*(s)$ . Actually, we can use the  
 636 similar method to prove that  $h(s) < h^*(s)$  for any  $s \in \mathbb{N}^+$ .

637 Then we show  $h^*(s) - h(s) \leq 2\eta_Y/M$  by proving that for any  $s \in \mathbb{N}^+$ ,  $h(s)$  must meet at least one  
 638 of the following two conditions:

- 639 (i)  $h(s) \in [h^*(s-1), h^*(s)]$ .  
 640 (ii)  $h^*(s) - h(s) < h^*(s-1) - h(s-1)$ .

641 If (i) doesn't hold, then we have for any  $t \in [s-1, s)$ ,  $h(t) \leq h(s) < h^*(s-1) = h^\circ(s-1)$ , which  
 642 results that  $\dot{h}(t) > \dot{h}^\circ(t)$  for all  $t \in [s-1, s)$ . Therefore,  $h^*(s) - h^*(s-1) = h^\circ(s) - h^\circ(s-1) <$   
 643  $h(s) - h(s-1)$  and thus  $h(s)$  meets condition (ii). It's clear that  $h(0)$  and  $h(1)$  meet (i).

644 These two conditions mean that the gap between  $h^*$  and  $h$  will not grow if  $h(s)$  is smaller than  
 645  $h^*(s-1)$ . Then for all  $h(s)$  that meet (i), we have  $h^*(s) - h(s) \leq h^*(s) - h^*(s-1) \leq h^*(1) -$   
 646  $h^*(0) = \eta_Y/M$  from Eqn. 33. And for any  $s \geq 2$ , every time  $h(s)$  transfer from (i) to (ii) exactly at  
 647  $s$ , which means that  $h(s-1)$  meets (i) and thus no smaller than  $h^*(s-2)$ , we get  $h^*(s) - h(s) \leq$   
 648  $h^*(s) - h(s-1) \leq h^*(s) - h^*(s-2) \leq h^*(2) - h^*(0) \leq 2\eta_Y/M$ .

649 Finally from Eqn. 53 in Lemma 9, when  $s \leq \frac{\ln M}{\eta_Y}$ , we get  $h(s) = \Theta(\eta_Y t/M)$  and thus there exist  
 650 some constant  $c = \Theta(1)$  such that  $h(s+c) \geq h(s) + 2\eta_Y/M \geq h^*(s) \geq h(s)$ .

651 (b) Assume that there exist  $\epsilon \in (0, 2\eta_Y/M]$  such that  $h^*(s) - h(s) \geq \epsilon$  for all  $s \in \mathbb{N}$ . Since  $h$  is  
 652 unbounded, then  $\dot{h}(t) \rightarrow 0$  when  $t \rightarrow \infty$  from Eqn. 33, so there exist some  $s'_0 \in \mathbb{N}$  such that when  
 653  $s \geq s'_0$ ,  $h(s+1) - h(s) \leq \epsilon + \ln(1/2)/M$ . Also, from Lemma 9 we know that exists  $s''_0 = \frac{(3+\delta)\ln(M)}{\eta_Y}$   
 654 where  $\delta > 0, \delta = \Theta(1)$  such that when  $s \geq s''_0$ ,  $\exp(Mh(s)) > 2(M-1)$ . Since  $s \rightarrow \infty$ , we just  
 655 consider the case that  $s = \lfloor t \rfloor \geq s_0 := \max(s'_0, s''_0)$ . Then denote  $\Delta_1 := \frac{2(M-1)}{\exp(Mh(s))} < 1$ , we have:

$$\begin{aligned} \dot{h}^\circ(t) - \dot{h}(t) &= \frac{\eta_Y}{M-1 + \exp(Mh^*(s))} - \frac{\eta_Y}{M-1 + \exp(Mh(t))} \\ &\leq \frac{\eta_Y}{M-1 + \exp(M(h(s) + \epsilon))} - \frac{\eta_Y}{M-1 + \exp(Mh(s+1))} \\ &= -\frac{\eta_Y \exp(Mh(s)) \cdot [\exp(M\epsilon) - \exp(Mh(s+1) - Mh(s))]}{[M-1 + \exp(M(h(s) + \epsilon))] \cdot [M-1 + \exp(Mh(s+1))]} \\ &\leq -\frac{\eta_Y \exp(Mh(s)) \cdot \exp(M\epsilon)}{2[M-1 + \exp(M(h(s) + \epsilon))] \cdot [M-1 + \frac{1}{2} \exp(M(h(s) + \epsilon))]} \\ &\leq -\frac{\eta_Y \exp(M\epsilon)}{(1 + \Delta_1)^2 \exp(Mh(s)) \exp(4\eta_Y)}, \quad (s \geq s_0 = \max(s'_0, s''_0)) \\ &\leq -\frac{\exp(M\epsilon)}{4 \exp(4\eta_Y) M} \cdot \frac{1}{t} =: -\frac{C}{t} \end{aligned} \quad (48)$$

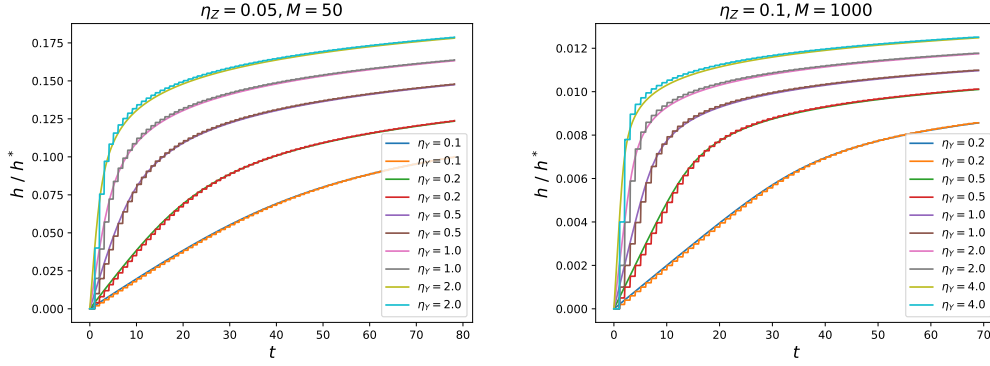

Figure 8: Numerical simulation of  $h^*$  and  $h$  with changing  $\eta_Y$ . The stepped folded line represents  $h^*$  and the smooth curve represents  $h$ . The gap between  $h^*$  and  $h$  is bounded and goes to zero when time grows.

Here  $C = \frac{\exp(M\epsilon)}{4\exp(4\eta_Y)M} > 0$  and for the last inequality, we use the fact that  $t \geq s'_0 > \frac{3\ln M}{\eta_Y}$  and thus  $h(s) \leq h(t) = O(\frac{\ln(M\eta_Y t)}{M})$  from Lemma 9. So we get

$$[h^\circ(t) - h(t)] - [h^\circ(s_0) - h(s_0)] \leq - \int_{t'=s_0}^t \frac{C dt'}{t'} \rightarrow -\infty \quad (49)$$

This contradicts  $h^\circ(t) - h(t) \geq 0$ ! So the original assumption doesn't hold, which means that  $h^*(s) - h(s) \rightarrow 0$  when  $s \rightarrow \infty$ .  $\square$

**Remark 2.** By some qualitative estimation, we claim that if  $\eta_Y = O(1)$ , then there exists some constant  $c = O(\ln M)$  such that  $h(s) \leq h^*(s) \leq h(s + c)$  for all  $s > s_1 := \frac{2\ln(1+\omega_1)}{\eta_Y}$  where  $\omega_1 = \Theta(\ln \ln M / \ln M)$  is defined in Lemma 8. Denote  $\delta h(t) := h^\circ(t) - h(t)$ , when  $\delta h(t) \ll h(t)$ , we have  $\dot{\delta h}(t) = \dot{h}^\circ(t) - \dot{h}(t) \asymp -\eta_Y M \cdot \delta h(t) \cdot \exp(-Mh(t)) \asymp -\delta h(t)/t$  by computing the second-order derivative of  $\delta h$ , and thus  $h^\circ(t) - h(t) \asymp 2\eta_Y s_0/(Mt) = O(\ln M/(Mt))$ . Combining this with the fact that  $h(t) = \Theta(\ln(M\eta_Y t)/M)$  when  $t > s_1$ , we prove our claim. The results of Lemma 7 and Remark 2 are also confirmed by the numerical simulation results as Fig. 8.

So from Lemma 7 and Remark 2, we just assume  $\eta_Y < 1$  and replace  $h^*$  with  $h$  in the latter parts for convenience. Then we further investigate the properties of Eqn. 45.

**Lemma 8.** There exists  $\omega_i, 0 < \omega_i \ll 1, i = 2, 3$ , such that for  $h \in \mathbb{J}_1 := [\frac{1}{M^{2-\omega_0}}, \frac{(1+\omega_1)\ln(M)}{M}]$ , we have  $\exp(Mh(t)) \leq (M-1)Mh(t)$ . And for  $h \notin \mathbb{J}_1$ , we have  $\exp(Mh(t)) > (M-1)Mh(t)$ . Here  $\omega_1 = \Theta(\frac{\ln \ln(M)}{\ln(M)})$ , and if  $M \gg 100$ , we have  $\omega_0 \lesssim (\frac{1}{M^{0.99} \ln M}) \ll 0.01$ .

*Proof.* It's obvious that  $\exp(Mh(t)) - (M-1)Mh(t)$  has two zero points in  $\mathbb{R}^+$ . Let  $h(t) = M^{-(2-\omega_0)}$ , we get

$$\omega_0 = \frac{1}{\ln M} (\ln(\frac{M}{M-1}) + \frac{1}{M^{1-\omega_0}}) = O(\frac{1}{M^{0.99} \ln(M)}) \quad (50)$$

For another zero point, let  $\omega_1 \in (0, 1)$  to be some constant such that  $h(t) = \frac{(1+\omega_1)\ln(M)}{M}$  satisfies  $\exp(Mh) = (M-1)Mh$ , then we get

$$\begin{aligned} M^{\omega_1} &= (1+\omega_1) \ln(M) \frac{(M-1)}{M} = c' \cdot \ln(M) \frac{(M-1)}{M} \\ \Rightarrow \omega_1 &= \Theta(\frac{\ln \ln(M)}{\ln(M)}) \end{aligned} \quad (51)$$

where  $c' \in (0.5, 2)$  is some universal constant.  $\square$

**Remark 3.** From Lemma 8, if we assume  $M \gg 100$ , then  $\omega_0 \ll 0.01$ , and if we assume  $\eta_Y \gg \frac{1}{M^{1-\omega_0}} > \frac{1}{M^{0.99}}$ , then  $h(1) \gtrsim \frac{\eta_Y}{M} \gg \frac{1}{M^{2-\omega_0}}$  and function  $\exp(Mh(t)) - (M-1)Mh(t)$  has only one zero point  $\frac{(1+\omega_1)\ln M}{M}$  in  $[1, \infty)$ . For convenience, we just assume  $M \gg 100$  and  $1 > \eta_Y \gg \frac{1}{M^{0.99}}$  and thus focus on the unique zero point  $\frac{(1+\omega_1)\ln M}{M}$  of  $h$  in the latter parts.

681 We can then show the properties of speed control coefficient  $\gamma(t) := \frac{(M-1)^2 h(t/K)}{(M-1) + \exp(Mh(t/K))}$  as below.

682 **Lemma 9.** *We have two stage for  $h$  and  $\gamma$ :*

- 683 • When  $t \leq \frac{K \ln(M)}{\eta_Y}$ , we have  $\exp(Mh(t/K)) \leq \min(M-1, (M-1)Mh(t/K))$ ,  $h =$   
684  $O(\eta_Y t / (MK))$  and  $\gamma(t) = O(\eta_Y t / K)$ .
- 685 • When  $t \geq \frac{2(1+\omega_1)K \ln(M)}{\eta_Y}$  where  $\omega_1 = \Theta(\frac{\ln \ln M}{\ln M})$  is defined in Lemma 8, we have  
686  $\exp(Mh(t/K)) \geq \max(M-1, (M-1)Mh(t/K))$ ,  $h = O(\frac{1}{M} \ln(M\eta_Y t / K))$  and  
687  $\gamma(t) = O(\frac{K \ln(M\eta_Y t / K)}{\eta_Y t})$ .

688 *Proof.* For convenience, we just let  $K = 1$ . And the proof for  $K \neq 1$  is similar. We denote  
689  $\Delta_1(h) := \frac{\exp(Mh)}{M-1}$  and  $\Delta_2(h) := \frac{\exp(Mh)}{(M-1)Mh}$ .

690 **Step 1:**  $t \leq \frac{\ln(M)}{\eta_Y}$ . If  $h \geq \frac{\ln(M-1)}{M}$ , from Eqn. 45 we have:

$$t \geq \frac{M-2 + (M-1) \ln(M-1)}{M\eta_Y} > \frac{\ln(M)}{\eta_Y} \quad (52)$$

691 So when  $t \leq \frac{\ln(M)}{\eta_Y}$  we have  $h < \frac{\ln(M-1)}{M}$ , and thus  $\exp(Mh(t)) \leq \min(M-1, (M-1)Mh(t))$ ,  
692 i.e.,  $\Delta_1, \Delta_2 \leq 1$ . Then from Eqn. 45 we get

$$h = \frac{M\eta_Y t + 1}{(1 + \Delta_2)M(M-1)} = O(\frac{1}{M} \eta_Y t) \quad (53)$$

693

$$\gamma = \frac{(M-1)h}{1 + \Delta_1} = \frac{M\eta_Y t + 1}{(1 + \Delta_1)(1 + \Delta_2)M} = O(\eta_Y t) \quad (54)$$

694 **Step 2:**  $t > \frac{2(1+\omega_1) \ln(M)}{\eta_Y}$  where  $\omega_1 = \Theta(\frac{\ln \ln M}{\ln M})$ . So now  $h > \frac{\ln(M-1)}{M}$  and thus  $\Delta_1 > 1$   
695 from Eqn. 52. Then if  $\exp(Mh) \leq M(M-1)h$ , i.e.  $\Delta_2 \leq 1$ , from Lemma 8 we have  $h =$   
696  $\frac{M\eta_Y t + 1}{(1 + \Delta_2)M(M-1)} \leq \frac{(1+\omega_1) \ln(M)}{M}$ . Therefore,

$$t \leq \frac{1}{\eta_Y} ((1 + \omega_1)(1 + \Delta_2) \frac{M-1}{M} \ln M - \frac{1}{M}) < \frac{2(1 + \omega_1) \ln(M)}{\eta_Y}. \quad (55)$$

697 Contradiction! So when  $t \geq \frac{2(1+\omega_1) \ln(M)}{\eta_Y}$ , we have  $\Delta_2 > 1$ . Then from Eqn. 45 we get:

$$h = \frac{1}{M} \ln \left( \frac{M\eta_Y t + 1}{1 + \Delta_2^{-1}} \right) = O\left(\frac{1}{M} \ln(M\eta_Y t)\right) \quad (56)$$

698

$$\gamma = \frac{M-1}{M} \frac{(M-1) \ln \left( \frac{M\eta_Y t + 1}{1 + \Delta_2^{-1}} \right)}{(1 + \Delta_1^{-1}) \left( \frac{M\eta_Y t + 1}{1 + \Delta_2^{-1}} \right)} = O\left(\frac{\ln(M\eta_Y t)}{\eta_Y t}\right) \quad (57)$$

699

□

#### 700 B.4 The dynamics under multiple uniformly sampled sequence classes

701 We then generalize our analysis of  $W$  to the case where  $x_{T+1}$  can be any value in  $[K]$  rather than  
702 fixing  $x_{T+1} = n$  with the key observation that the row vectors of  $W'$  can be independently updated.  
703 Before formalizing this result, we first conduct the concentration inequality of the sampling number  
704 for each next-token case. Let  $N_n := \sum_{i=1}^N \mathbb{I}[x_{T+1} = n]$  to be the number of times the event  
705  $x_{T+1} = n$  happens, then we have:

706 **Lemma 10.** *For  $\delta \in (0, 1)$ , with probability at least  $1 - \delta$  we have*

$$|N_n - \mathbb{E}[N_n]| \leq \sqrt{\frac{N}{2} \ln\left(\frac{2}{\delta}\right)} + 1 < \sqrt{N \ln\left(\frac{2}{\delta}\right)} \quad (58)$$

707 *Proof.* From Hoeffding's inequality, we have

$$\mathbb{P}\left(\left|\frac{N_n}{N} - \mathbb{P}(n)\right| > t\right) \leq 2\exp(-2Nt^2) \quad (59)$$

708 Let  $t = \sqrt{\frac{1}{2N} \ln(\frac{2}{\delta})}$  and we can get the results by direct calculation.  $\square$

709 **Remark 4.** From Lemma 10, if we consider the uniform sampling case where  $\mathbb{P}(n) \equiv \frac{1}{K}$ , then  
 710  $N\mathbb{P}(n) = N/K \gg \sqrt{N}$ . So  $N_n$  are all concentrated around  $N\mathbb{P}(n)$ . Recall the definition of  
 711  $\bar{N} = \lceil N/K \rceil$  and  $\Delta = \lceil \sqrt{N \ln(\frac{1}{\delta})} \rceil$ , with probability at least  $1 - \delta$  we have:

$$|N_n - \bar{N}| \lesssim \Delta \ll \bar{N} \quad (60)$$

712 We then further investigate the concentration of  $h(N_n)$ :

713 **Lemma 11.** For  $\delta \in (0, 1)$ , with probability at least  $1 - \delta$  we have

$$|h(N_n) - h(\bar{N})| \lesssim h(\bar{N}) \cdot \frac{\Delta}{\bar{N}} \quad (61)$$

714

$$\begin{aligned} & \left| \frac{1}{M-1+\exp(Mh(N_n))} - \frac{1}{M-1+\exp(Mh(\bar{N}))} \right| \\ & \lesssim \frac{1}{M-1+\exp(Mh(\bar{N}))} \cdot \sigma' \end{aligned} \quad (62)$$

715 where  $\sigma' > 0$  is some constant such that  $\sigma' \leq \frac{1}{3}\eta_Y \Delta \ll \ln(M)$ . And if  $N \geq \frac{2K(1+\omega_1) \ln M}{\eta_Y}$  where  
 716  $\omega_1$  is defined in Lemma 8, then  $\sigma' \lesssim \frac{\Delta}{N} \ll 1$ .

717 *Proof.* First, we note that  $h$  has a decreasing gradient, so  $h(x) \geq \dot{h}(x) \times x$  and  $h(x_1+x_2) - h(x_1) \leq$   
 718  $\dot{h}(x_1) \times x_2$  for any  $x_1, x_2 \geq 0$ . So with probability at least  $1 - \delta$ , we have:

$$|h(N_n) - h(\bar{N})| \leq h(\bar{N}) - h(\bar{N} - \Delta) \leq \dot{h}(\bar{N} - \Delta) \times \Delta \leq \frac{h(\bar{N})\Delta}{\bar{N} - \Delta} \asymp h(\bar{N}) \cdot \frac{\Delta}{\bar{N}} \quad (63)$$

719 For the second inequality, without loss of generality, we let  $N_n > \bar{N}$ . Denote  $g(s) := (M-1 +$   
 720  $\exp(Mh(s)))^{-1}$  and note that:

$$\begin{aligned} \frac{dg}{ds} &= \frac{M \exp(Mh(s))}{(M-1+\exp(Mh(s)))^2} \cdot \frac{dh}{ds} \\ &= \frac{1}{M-1+\exp(Mh(s))} \cdot \frac{\eta_Y M \exp(Mh(s))}{(M-1+\exp(Mh(s)))^2} \\ &\leq \frac{1}{M-1+\exp(Mh(s))} \cdot \frac{M}{(M-1)} \cdot \frac{\eta_Y}{4} \end{aligned} \quad (64)$$

721 the last equality holds only when  $h(s) = \frac{\ln(M-1)}{M}$ . So from  $|g(\bar{N} + \Delta) - g(N_n)| \leq$   
 722  $\max_{s \in [N_n, N_n + \Delta]} \dot{g}(s) \cdot \Delta$ , we get:

$$\left| \frac{1}{M-1+\exp(Mh(\bar{N} + \Delta))} - \frac{1}{M-1+\exp(Mh(\bar{N}))} \right| \leq \frac{1}{M-1+\exp(Mh(\bar{N}))} \cdot \frac{1}{3}\eta_Y \Delta \quad (65)$$

723 If  $\bar{N} < \frac{2(1+\omega_1)\ln(M)}{\eta_Y} + \Delta$  with  $\omega_1 = \Theta(\frac{\ln \ln M}{\ln M})$  defined in Lemma 8, we have  $\sigma' \leq \eta_Y \Delta/3 \ll$   
 724  $\eta_Y \bar{N} \lesssim \ln(M)$ . If  $\bar{N} \geq \frac{2(1+\omega_1)\ln(M)}{\eta_Y} + \Delta$ , we utilize the Eqn.45 and obtain:

$$\begin{aligned}
 & \left| \frac{1}{M-1+\exp(Mh(\bar{N}+\Delta))} - \frac{1}{M-1+\exp(Mh(\bar{N}))} \right| \\
 &= \frac{1}{M-1+\exp(Mh(\bar{N}))} \cdot \frac{|\exp(Mh(\bar{N}+\Delta)) - \exp(Mh(\bar{N}))|}{M-1+\exp(Mh(\bar{N}+\Delta))} \\
 &\leq \frac{1}{M-1+\exp(Mh(\bar{N}))} \cdot \frac{M\eta_Y \Delta}{M-1+\exp(Mh(\bar{N}+\Delta))}, \quad (\text{Eqn. 45}) \\
 &\leq \frac{1}{M-1+\exp(Mh(\bar{N}))} \cdot \frac{M\eta_Y \Delta}{M+\frac{1}{2} \cdot M\eta_Y(\bar{N}+\Delta)}, \quad (\text{Lemma 9, } N_n \geq \frac{2(1+\omega_1)\ln(M)}{\eta_Y} + \Delta) \\
 &\lesssim \frac{1}{M-1+\exp(Mh(\bar{N}))} \cdot \frac{\Delta}{\bar{N}}
 \end{aligned}$$

725 So  $\sigma' \leq \Delta/\bar{N}$ . When  $N_n < \bar{N}$ , with probability at least  $1 - \delta$  we have  $N_n \gtrsim \bar{N} - \Delta$ , and similar  
 726 inequalities also hold for such cases, so we finish the proof.  $\square$

727 Recall that  $\zeta_n \in \mathbb{R}^M$  is defined as  $\zeta_n = \frac{M}{M-1}(e_n - \frac{1}{M}\mathbf{1})$ . And we have  $q_1 := \zeta_i^\top \zeta_i = 1 +$   
 728  $\frac{1}{M-1}$ ,  $q_0 := \zeta_j^\top \zeta_i = -\frac{M}{(M-1)^2}$  for all  $i, j \in [M]$  where  $i \neq j$ . For convenience, we denote  
 729  $\bar{W}'(N) := [\bar{w}_1(N), \dots, \bar{w}_K(N), \mathbf{0}, \dots, \mathbf{0}]^\top \in \mathbb{R}^{M \times M}$ , where  $\bar{w}_n(N) := (M-1)h(\lceil N/K \rceil)\zeta_n =$   
 730  $(M-1)h(\bar{N})\zeta_n$ . So using these concentration inequalities, we get:

731 **Lemma 12.** Assume the assumptions in Lemma 5 hold but we uniformly sample the training data.  
 732 Then if the total number of epochs  $N$  satisfies  $N \gg K^2$ , we have  $Y = (F')^{-\top}(I + \Theta')\bar{W}'(N)$   
 733 where  $\Theta' := \text{diag}(\theta_1, \dots, \theta_K, 0, \dots, 0) \in \mathbb{R}^{M \times M}$  and with probability at least  $1 - \delta$  we have  
 734  $|\theta_i| \lesssim \frac{K}{\sqrt{N}} \sqrt{\ln(\frac{K}{\delta})}, \forall i \in [K]$ .

735 *Proof.* From Lemma 5 and the first inequality of Lemma 11, we know that

$$\mathbf{w}_n(N) = (M-1)h(N_n)\zeta_n \quad (66)$$

$$= (M-1)h(\bar{N})\zeta_n + (M-1)(h(N_n) - h(\bar{N}))\zeta_n \quad (67)$$

$$= (1 + \theta_n) \cdot (M-1)h(\bar{N})\zeta_n \quad (68)$$

$$= (1 + \theta_n)\bar{w}_n(N) \quad (69)$$

736 where for any  $\delta \in (0, 1)$ , with probability at least  $1 - \delta$  we have  $|\theta_i| \lesssim \frac{K}{\sqrt{N}} \sqrt{\ln(\frac{K}{\delta})}, \forall n \in [K]$ .  
 737 Therefore,  $W'(N) = [\mathbf{w}_1(N), \dots, \mathbf{w}_K(N), \mathbf{0}, \dots, \mathbf{0}]^\top = (I + \Theta')\bar{W}'(N)$ , then from  $W' =$   
 738  $(F')^\top Y$ , we finish the proof.  $\square$

739 Then, we can give out the exact solution of  $Y$  by pointing out the properties of  $F^\circ$  and  $F'$  from the  
 740 observation that each row of  $Y$  should be the linear combination of vectors in  $\{\mathbf{f}_n^\top\}_{n \in [K]}$ :

741 **Theorem 5.** If Assumption 2 holds and  $Y(0) = 0$ . Furthermore, we assume the training data is  
 742 uniformly sampled and the total number of epochs  $N$  satisfies  $N \gg K^2$ . Then the solution of  
 743 Eqn. 26 will be:

$$Y = (F^\dagger)^\top (I + \Theta)\bar{W}(N) = F(I - E')(I + \Theta)\bar{W}(N) \quad (70)$$

744 Here  $\Theta := \text{diag}(\theta_1, \dots, \theta_K)$  and for any  $\delta \in (0, 1)$ , with probability at least  $1 - \delta$  we have  $|\theta_i| \lesssim$   
 745  $\frac{K}{\sqrt{N}} \sqrt{\ln(\frac{K}{\delta})}, \forall i \in [K]$ .

746 *Proof.* Let  $\mathbf{q}_i, i \in [M]$  be the  $i$ -th row vector of  $(F')^{-1}$ , then we have  $\mathbf{q}_j^\top \mathbf{f}_i = \mathbb{I}[i = j]$ . From  
 747 Lemma 12 we get  $Y = (F')^{-\top}(I + \Theta')\bar{W}'(N)$ . And from Eqn. 26, we know all the columns of  $Y$   
 748 are the linear combination of  $\mathbf{f}_n, n \in [K]$ . Note that  $\bar{W}(N)$  has only top  $K$  rows to be non-zero,  
 749 so we need to constrain that all the top  $K$  columns of  $(F')^{-\top}$ , i.e.,  $\mathbf{q}_i, i \in [K]$ , to be the linear  
 750 combination of  $\mathbf{f}_n, n \in [K]$ , which means that  $\mathbf{q}_1, \dots, \mathbf{q}_K$  must be the basis of  $\Xi := \text{span}(\mathbf{f}_j; j \in$

751  $[K]$ ) and thus  $\mathbf{q}_{K+1}, \dots, \mathbf{q}_M$  are the basis of  $\Xi' := \text{span}(\mathbf{f}_j; K \leq j \leq M)$ . Therefore, we get  
 752  $\Xi \perp \Xi'$ , and thus  $[\mathbf{q}_1, \dots, \mathbf{q}_K]$  can only be  $(F^\dagger)^\top$ . So the proof is done.

753 □

754 Actually, we see that the result of Theorem 5 matches the modified gradient update on  $Y$  (Eqn. 26).  
 755 And we show that using such reparameterization dynamics, we can still approach the critical point  
 756 of Eqn. 7 in the rate of  $\mathcal{O}(\frac{1}{N})$ :

757 **Corollary 1.** Assume assumptions in Theorem 5 hold,  $M \gg 100$  and  $\eta_Y$  satisfies  $M^{-0.99} \ll \eta_Y <$   
 758 1. Then  $\forall n \in [K]$ , we have

$$\begin{aligned} (\mathbf{x}_{T+1} - \boldsymbol{\alpha}_n) &= \frac{M-1}{(M-1) + \exp(Mh(N_n))} \boldsymbol{\zeta}_n \\ &= \frac{M-1}{(M-1) + \exp(Mh(\bar{N}))} \cdot (1 + \sigma) \cdot \boldsymbol{\zeta}_n \end{aligned} \quad (71)$$

759 where  $\sigma > -1$  and for any  $\delta \in (0, 1)$ , with probability at least  $1 - \delta$  we have  $|\sigma| \lesssim \eta_Y \sqrt{N \ln(\frac{1}{\delta})}$ ,  
 760 and when  $N \gg K(\sqrt{N \ln(\frac{1}{\delta})} + \frac{2(1+\omega_1) \ln M}{\eta_Y})$  with  $\omega_1$  defined in Lemma 8,  $|\sigma| \lesssim \frac{K}{\sqrt{N}} \sqrt{\ln(\frac{1}{\delta})}$ .  
 761 Further, to let  $\|\mathbf{x}_{T+1} - \boldsymbol{\alpha}_n\|_2 \leq \epsilon$  with probability at least  $1 - \delta$  for any  $n \in [K]$  and  $\epsilon \ll 1$ , we  
 762 need the total number of training epochs to be at most  $O(\frac{K}{\epsilon \eta_Y} \log(\frac{M}{\epsilon}))$ .

763 *Proof.* Note that  $\mathbf{x}_{T+1} = \mathbf{e}_n$ , then we just need to combine Lemma 5 and the second inequality of  
 764 Lemma 11, to get Eqn. 71. Denote  $S_n$  to be the number of training epochs that are needed to let  
 765  $\|\mathbf{x}_{T+1} - \boldsymbol{\alpha}_n\|_2 \asymp \epsilon$ , then we have

$$h(S_n) \asymp \frac{1}{M} \ln\left(\frac{M}{\epsilon}\right) \quad (72)$$

766 But note that  $h(t+1) - h(t) \geq \frac{\eta_Y}{M-1+\exp(Mh(S_n))} \asymp \frac{\eta_Y \epsilon}{M-1}, \forall t \in [0, S-1]$  from Eqn. 71, we have

$$S_n \lesssim \frac{h(S_n)}{\eta_Y \epsilon / (M-1)} \asymp \frac{1}{\epsilon \eta_Y} \ln\left(\frac{M}{\epsilon}\right) \quad (73)$$

767 Note that  $\epsilon \ll 1$  and we have  $N \gg K^2$ , then we have  $S = \sum_n S_n \lesssim \frac{K}{\epsilon \eta_Y} \ln(\frac{M}{\epsilon})$ . □

## 768 B.5 Proof of Theorem 1

769 Finally, we turn to prove Theorem 1. Obviously, all the diagonal elements of  $E$  are zero and all  
 770 the off-diagonal elements of  $E$  are non-negative since  $c_{l|m,n} \geq 0$ . Note that  $E$  is a real symmetric  
 771 matrix, then it can be orthogonal diagonalization by  $E = U^\top D U$  where  $U := [\mathbf{u}_1, \dots, \mathbf{u}_K] \in$   
 772  $O_{K \times K}$ ,  $D = \text{diag}(\lambda_1, \dots, \lambda_K)$  and  $|\lambda_1| \geq \dots \geq |\lambda_K| \geq 0$ . Then we can get the following properties  
 773 of  $E$  and  $E'$ :

774 **Lemma 13.**  $\max_{i,j \in [K]} (|E_{ij}|) \leq |\lambda_1|$ .

775 *Proof.* We have:

$$|E_{ij}| = \mathbf{u}_i^\top D \mathbf{u}_j \leq |\lambda_1| \cdot \|\mathbf{u}_i\|_2 \|\mathbf{u}_j\|_2, \quad \forall i, j \in [K] \quad (74)$$

776 □

777 **Lemma 14.** If  $E \in \mathbb{R}^K$  satisfies  $|\lambda_1| \leq \lambda < 1$ , then  $(I + E)$  is invertible and  $(I + E)^{-1} = I - E'$   
 778 ,where  $E'$  satisfies  $E' = U^\top D' U$  and  $D' = \text{diag}(\lambda'_1, \dots, \lambda'_K)$  and  $\lambda'_i = \frac{\lambda_i}{1+\lambda_i}, \forall i \in [K]$ .

779 *Proof.* Since  $U$  is orthonormal and  $|\lambda_i| \leq \lambda < 1$ , we have  $E^n = U^\top D^n U \rightarrow \mathbf{O}$ . Then from the  
 780 property of the Neumann series, we get  $I + E$  is invertible and

$$(I + E)^{-1} = I + \sum_{n=1}^{\infty} (-1)^n E^n \quad (75)$$

$$= I + U^\top \left( \sum_{n=1}^{\infty} (-D^n) \right) U \quad (76)$$

$$= I - U^\top D' U =: I - E' \quad (77)$$

781 Here we define  $D' = \text{diag}(\lambda'_1, \dots, \lambda'_K)$  and use the fact that  $\sum_{n=1}^{\infty} (-\lambda_i)^n = -\frac{\lambda_i}{1+\lambda_i}$   $\square$

782 **Lemma 15.** If  $|\lambda_1| \leq \lambda < 1$ , then  $\max_{i \in [K]} |\lambda_i(E')| \leq \frac{1}{1-\lambda} |\lambda_1| \leq \frac{\lambda}{1-\lambda}$ .

783 *Proof.* We have

$$\max_{i \in [K]} |\lambda_i(E')| = \max_{i \in [K]} \left| -\frac{\lambda_i}{1+\lambda_i} \right| \leq \frac{\max_{i \in [K]} |\lambda_i|}{1 - \max_{i \in [K]} |\lambda_i|} \leq \frac{1}{1-\lambda} |\lambda_1| \quad (78)$$

784  $\square$

785 **Lemma 16.** Assume that Assumption 2 holds, then all the diagonal elements of  $E'$  are non-  
 786 positive, i.e.,  $E'_{ii} \leq 0, \forall i \in [K]$ . Further, if there exist any  $k \neq i \in [K]$  such that  $E_{ki} > 0$ ,  
 787 then  $E'_{ii} < 0$ .

788 *Proof.* Note that  $E_{ii} = \sum_{k=1}^K \lambda_k u_{ik}^2 = 0$  (here  $u_{ik}$  is the  $k$ -th component of eigenvector  $\mathbf{u}_i$ ) and  
 789  $|\lambda_k| < 1$ , we have

$$E'_{ii} = \sum_{k=1}^K \frac{\lambda_k}{1+\lambda_k} u_{ik}^2 = \sum_{k=1}^K \lambda_k u_{ik}^2 - \sum_{k=1}^K \frac{\lambda_k^2}{1+\lambda_k} u_{ik}^2 = - \sum_{k=1}^K \frac{\lambda_k^2}{1+\lambda_k} u_{ik}^2 \leq 0 \quad (79)$$

790 When  $E'_{ii} = 0$ , then  $\boldsymbol{\lambda} := (\lambda_1, \dots, \lambda_K)$  must don't have overlapping entries with respect to  $\mathbf{u}_i$ ,  
 791 which results that  $E_{ij} := \sum_{k=1}^K \lambda_k u_{ik} u_{jk} = 0$  holds for any  $j \in [K]$ . So we prove the results.

792  $\square$

793 **Lemma 17.** If  $\lambda_1 < 1$ , then  $|E'_{nn'} - E_{nn'}| \leq |\lambda_1|^2 (1 - |\lambda_1|)^{-1}$ .

794 *Proof.* From Lemma 14 we have:

$$\begin{aligned} |E'_{nn'} - E_{nn'}| &= \left| \sum_{k=1}^K \lambda_k u_{nk} u_{n'k} - \sum_{k=1}^K \frac{\lambda_k}{1+\lambda_k} u_{nk} u_{n'k} \right| \\ &= \left| \sum_{k=1}^K \frac{\lambda_k^2}{1+\lambda_k} u_{nk} u_{n'k} \right| \\ &\leq \frac{|\lambda_1|^2}{1-|\lambda_1|} \sum_{k=1}^K |u_{nk}| |u_{n'k}| \\ &\leq \frac{|\lambda_1|^2}{1-|\lambda_1|} \sqrt{\left( \sum_{k=1}^K |u_{nk}|^2 \right) \left( \sum_{k=1}^K |u_{n'k}|^2 \right)} = \frac{|\lambda_1|^2}{1-|\lambda_1|} \end{aligned} \quad (80)$$

795  $\square$

796 Finally we can prove our main theorem in Sec. 4.

797 **Theorem 1.** *If Assumption 2 holds, the initial condition  $Y(0) = 0$ ,  $M \gg 100$ ,  $\eta_Y$  satisfies*  
798  *$M^{-0.99} \ll \eta_Y < 1$ , and each sequence class appears uniformly during training, then after*  
799  *$t \gg K^2$  steps of batch size 1 update, given event  $x_{T+1}[i] = n$ , the backpropagated gradient*  
800  *$\mathbf{g}[i] := Y(\mathbf{x}_{T+1}[i] - \boldsymbol{\alpha}[i])$  takes the following form:*

$$\mathbf{g}[i] = \gamma \left( \iota_n \mathbf{f}_n - \sum_{n' \neq n} \beta_{nn'} \mathbf{f}_{n'} \right) \quad (9)$$

801 *Here the coefficients  $\iota_n(t)$ ,  $\beta_{nn'}(t)$  and  $\gamma(t)$  are defined in Appendix with the following properties:*

- 802 • **(a)**  $\xi_n(t) := \gamma(t) \sum_{n' \neq n} \beta_{nn'}(t) \mathbf{f}_n^\top(t) \mathbf{f}_{n'}(t) > 0$  for any  $n \in [K]$  and any  $t$ ;
- 803 • **(b)** The speed control coefficient  $\gamma(t) > 0$  satisfies  $\gamma(t) = O(\eta_Y t / K)$  when  $t \leq \frac{\ln(M) \cdot K}{\eta_Y}$   
804 and  $\gamma(t) = O\left(\frac{K \ln(\eta_Y t / K)}{\eta_Y t}\right)$  when  $t \geq \frac{2(1+\delta') \ln(M) \cdot K}{\eta_Y}$  with  $\delta' = \Theta\left(\frac{\ln \ln M}{\ln M}\right)$ .

805 *Proof.* Note that if Assumption 2 holds, then  $F^\dagger = (I - E')F^\top$ . Recall  $q_1 := 1 + \frac{1}{M-1} \approx 1$  and  
806  $q_0 := -\frac{M}{(M-1)^2} \approx 0$ . Then given  $x_{T+1}[i] = n$ , we get:

$$\mathbf{g}[i] := Y(\mathbf{x}_{T+1}[i] - \boldsymbol{\alpha}[i]) \quad (81)$$

$$= F(I - E')(I + \Theta)\bar{W}(N)(\mathbf{x}_{T+1}[i] - \boldsymbol{\alpha}[i]), \quad (\text{Theorem 5}) \quad (82)$$

$$= (1 + \sigma)\gamma * F(I - E')(I + \Theta)[q_0, \dots, q_1, \dots, q_0]^\top, \quad (\text{Lemma 5, Corollary 1}) \quad (83)$$

$$= \gamma \left( \iota_n \mathbf{f}_n - \sum_{n' \neq n, n' \in [K]} \beta_{nn'} \mathbf{f}_{n'} \right) \quad (84)$$

807 where

$$\gamma(t) := \frac{(M-1)^2 h(\lceil t/K \rceil)}{(M-1) + \exp(Mh(\lceil t/K \rceil))} > 0 \quad (85)$$

$$\iota_n := (1 + \sigma)[q_1 \cdot (1 + \theta_n)(1 - E'_{nn}) - q_0 \sum_{k \neq n, k \in [K]} (1 + \theta_k) E'_{kn}] \quad (86)$$

$$= (1 + \sigma)[(1 - E'_{nn}) \cdot (1 + \delta_1) + \delta_2] \quad (87)$$

$$\beta_{nn'} := (1 + \sigma)[q_1 \cdot (1 + \theta_n) E'_{nn'} + q_0((1 + \theta_{n'}) + \sum_{k \neq n, k \in [K]} (1 + \theta_k) E'_{kn'})] \quad (88)$$

$$= (1 + \sigma)[E'_{nn'} \cdot (1 + \delta_1) + \delta_3] \quad (89)$$

808 Here  $\sigma$  is defined in Cor. 1 and satisfies  $-1 < \sigma \ll \ln M$ .  $|\delta_1| \lesssim \frac{K}{\sqrt{N}} \sqrt{\ln(\frac{1}{\delta})} + \frac{1}{M} \ll 1$  and  
809  $|\delta_2|, |\delta_3| \leq \frac{M}{(M-1)^2} \times 2(1 + 3|\delta_1|) < \frac{3}{M}$ . Here we use the fact that  $|\theta|, |\theta_i| \lesssim \frac{K}{\sqrt{N}} \sqrt{\ln(\frac{1}{\delta})}$ ,  
810  $\sum_{k \in [K]} \lambda_k u_{jk} u_{jn'} = E_{kn'}$  and the fact from Lemma 15:

$$|E'_{kn}| \leq \max_{i \in [K]} |\lambda_i(E')| \leq \frac{1}{1 - 1/K} |\lambda_1| \leq \frac{1}{K-1} \quad (90)$$

811 **(a)** Now let's prove that  $\xi_n(t) > 0$ . First from  $(I + E)(I - E') = I$  we have  $E - E' - EE' = O$ .  
812 Then use the symmetry of  $E$  and  $E'$ , we get

$$(EE')_{nn} = \sum_{k=1} E_{nk} E'_{kn} = \sum_{k=1} E_{nk} E'_{nk} = \sum_{k=1} E_{nk} E'_{nk} = \sum_{k \neq n} E_{nk} E'_{nk} + E_{nn} E'_{nn} \quad (91)$$

813 Note that  $F^\top F = I + E$ , we have  $E_{nn'} = \mathbf{f}_n^\top \mathbf{f}_{n'}, \forall n' \neq n$  and  $E_{nn} = 0$ . Then

$$(E - E' - EE')_{nn} = O_{nn} = 0 \Rightarrow \sum_{k \neq n} E_{nk} E'_{nk} = -E'_{nn} \quad (92)$$

814 Note that  $|\lambda_i(E)| > 0, \forall i \in [K]$  in Assumption 2 implies that  $E_{ki} > 0$  holds for some  $k \neq i \in [K]$ .  
815 Then from (1) of Lemma 16 we get  $\sum_{k \neq n} E'_{nn'} \mathbf{f}_n^\top \mathbf{f}_{n'} > 0$ .  
816 From Theorem 1 we have  $\beta_{nn'} = (1 + \sigma)[E'_{nn'} \cdot (1 + \delta_1) + \delta_3]$ . Note that  $0 < 1 + \sigma \ll \ln(M)$ , we  
817 have:

$$\begin{aligned}
\sum_{n' \neq n} \beta_{nn'} \mathbf{f}_n^\top \mathbf{f}_{n'} &= (1 + \sigma) \left[ \sum_{n' \neq n} [E'_{nn'}(1 + \delta_1) + \delta_3] E_{nn'} \right] \\
&= (1 + \sigma) \left[ -(1 + \delta_1) E'_{nn} + \delta_3 \sum_{n' \neq n} E_{nn'} \right] \\
&= (1 + \sigma) \left[ (1 + \delta_1) \sum_{k=1}^K \frac{\lambda_k^2}{1 + \lambda_k} u_{nk}^2 + \delta_3 \sum_{n' \neq n} E_{nn'} \right] \quad (\text{Eqn. 79}) \\
&\geq (1 + \sigma) \left[ \frac{1 + \delta_1}{1 - |\lambda_1|} (\min_i |\lambda_i(E)|^2) - \frac{3}{M} \cdot K |\lambda_1| \right], \quad (\text{Eqn. 90, } |\delta_3| < \frac{3}{M}) \\
&> (1 + \sigma) \left[ \frac{1}{2} (\min_i |\lambda_i(E)|^2) - \frac{3}{M} \cdot K |\lambda_1| \right], \quad (|\delta_1| \ll 1, |\lambda_1| < \frac{1}{K} \ll 1) \\
&> 0, \quad (\text{Assumption 2})
\end{aligned} \tag{93}$$

818 (b) We directly use Lemma 9, then we finish the proof.  $\square$

## 819 C Proof of Section 5

820 **Lemma 4** (Self-attention dynamics). *With Assumption 1(b) (i.e.,  $T \rightarrow +\infty$ ), Eqn. 4 becomes:*

$$\dot{\mathbf{z}}_m = \eta_Z \gamma \sum_{n \in \psi^{-1}(m)} \text{diag}(\mathbf{f}_n) \sum_{n' \neq n} \beta_{nn'} (\mathbf{f}_n \mathbf{f}_n^\top - I) \mathbf{f}_{n'}, \tag{10}$$

821 *Proof.* Taking long sequence limit ( $T \rightarrow +\infty$ ), and summing over all possible choices of next token  
822  $x_{T+1} = n$ , plugging in the backpropagated gradient (Eqn. 9) into the dynamics of  $Z$  with last token  
823  $m$  (Eqn. 4), we arrive at the following:

$$\dot{\mathbf{z}}_m = \eta_Z \sum_{n \in \psi^{-1}(m)} \text{diag}(\mathbf{c}_n) \frac{P_{\mathbf{f}_n}^\perp}{\|\mathbf{c}_n\|_2} Y(\mathbf{x}_{T+1}[i] - \boldsymbol{\alpha}[i]) \tag{94}$$

$$= -\eta_Z \gamma \sum_{n \in \psi^{-1}(m)} \text{diag}(\mathbf{f}_n) P_{\mathbf{f}_n}^\perp \sum_{n' \neq n} \beta_{nn'} \mathbf{f}_{n'} \tag{95}$$

$$= \eta_Z \gamma \sum_{n \in \psi^{-1}(m)} \text{diag}(\mathbf{f}_n) (\mathbf{f}_n \mathbf{f}_n^\top - I) \sum_{n' \neq n} \beta_{nn'} \mathbf{f}_{n'} \tag{96}$$

824 Note here we leverage the property that  $P_{\mathbf{f}}^\perp \mathbf{f} = 0$  and  $P_{\mathbf{c}_n}^\perp = P_{\mathbf{f}_n}^\perp$ .  $\square$

825 **Theorem 2** (Fates of contextual tokens). *Let  $G_{CT}$  be the set of common tokens (CT), and  $G_{DT}(n)$*   
826 *be the set of distinct tokens (DT) that belong to next token  $n$ . Then if Assumption 2 holds, under the*  
827 *self-attention dynamics (Eqn. 10), we have:*

- 828 • (a) for any distinct token  $l \in G_{DT}(n)$ ,  $\dot{z}_l > 0$ ;
- 829 • (b) if  $|G_{CT}| = 1$ , then for the single common token  $l \in G_{CT}$ ,  $\dot{z}_l < 0$ .

830 *Proof.* For any token  $l$ , we have:

$$\dot{z}_l = \eta_Z \gamma \sum_{n \in \psi^{-1}(m)} f_{nl} \sum_{n' \neq n} \beta_{nn'} [(\mathbf{f}_n^\top \mathbf{f}_{n'}) f_{nl} - f_{n'l}] \tag{97}$$

831 **Distinct token.** For a token  $l$  distinct to  $n$ , by definition, for any  $n' \neq n$ ,  $\mathbb{P}(l|m, n') = 0$  and  
 832  $f_{n'l}(t) \propto \mathbb{P}(l|m, n') \exp(z_l) \equiv 0$ . Therefore, we have:

$$\dot{z}_l = \eta_Z \gamma f_{nl}^2 \sum_{n' \neq n} \beta_{nn'} \mathbf{f}_n^\top \mathbf{f}_{n'} = \eta_Z f_{nl}^2 \xi_n > 0 \quad (98)$$

833 Note that  $\dot{z}_l \geq 0$  is achieved by  $\xi_n > 0$  from Theorem 1.

834 **Common token.** If  $n$  and  $n'$  does not overlap then  $\text{diag}(\mathbf{f}_n)(\mathbf{f}_n \mathbf{f}_n^\top - I) \mathbf{f}_{n'} = -\text{diag}(\mathbf{f}_n) \mathbf{f}_{n'} = 0$ .  
 835 When  $n$  and  $n'$  overlaps, let  $G_{CT}(n, n') := \{l : \mathbb{P}(l|n) \mathbb{P}(l|n') > 0\}$  be the subset of common tokens  
 836 shared between  $n$  and  $n'$ , since  $|G_{CT}| = 1$  and  $\emptyset \neq G_{CT}(n, n') \subseteq G_{CT} := \bigcup_{n \neq n'} G_{CT}(n, n')$ , we  
 837 have  $|G_{CT}(n, n')| = 1$  and  $l \in G_{CT}(n, n')$ , i.e., the common token  $l$  is the unique overlap. Then  
 838 we have:

$$f_{nl} [(\mathbf{f}_n^\top \mathbf{f}_{n'}) f_{nl} - f_{n'l}] = (\mathbf{f}_n^\top \mathbf{f}_{n'}) f_{nl}^2 - \mathbf{f}_n^\top \mathbf{f}_{n'} = -(1 - f_{nl}^2)(\mathbf{f}_n^\top \mathbf{f}_{n'}) \quad (99)$$

839 So we have:

$$\dot{z}_l = -\eta_Z \gamma \sum_{n \in \psi^{-1}(m)} (1 - f_{nl}^2) \sum_{n' \neq n} \beta_{nn'} \mathbf{f}_n^\top \mathbf{f}_{n'} = -\eta_Z \sum_{n \in \psi^{-1}(m)} (1 - f_{nl}^2) \xi_n \leq 0 \quad (100)$$

840 Since  $\xi_n(t) > 0$ , the only condition that  $\dot{z}_l = 0$  is that  $f_{nl}^2 = 1$ . However, since at least one such  
 841  $n$  has another distinct token  $l'$ , and thus  $f_{nl'} > 0$ , by normalization condition,  $f_{nl} < 1$  and thus  
 842  $\dot{z}_l < 0$ .

843 □

844 Note that for multiple common tokens, things can be quite involved. Here we prove a case when the  
 845 symmetric condition holds.

846 **Corollary 2** (Multiple CTs, symmetric case). *If Assumption 2 holds and assume*

- 847 • (1) Symmetry. For any two next tokens  $n \neq n'$ , there exists a one-to-one mapping  $\phi$  that  
 848 maps token  $l \in G_{DT}(n)$  to  $l' \in G_{DT}(n')$  so that  $\mathbb{P}(l|n) = \mathbb{P}(\phi(l)|n')$ ;
- 849 • (2) Global common tokens with shared conditional probability: i.e., the global common  
 850 token set  $G_{CT}$  satisfies the following condition: for any  $l \in G_{CT}$ ,  $\mathbb{P}(l|n) = \rho_l$ , which is  
 851 independent of next token  $n$ ;
- 852 • (3) The initial condition  $Z(0) = 0$ .

853 Then for any common token  $l \in G_{CT}^*$ ,  $\dot{z}_l < 0$ .

854 *Proof.* We want to prove the following **induction hypothesis**: for any  $t$  (a)  $z_l(t) = z_{\phi(l)}(t)$  for  $n$   
 855 and  $n'$ , where  $n$  (and  $n'$ ) are the next tokens that the distinct token  $l$  (and  $l'$ ) belongs to, and (b) the  
 856 normalization term  $o_n^2(t) := \sum_l \tilde{c}_{l|n}^2(t) = o^2(t)$ , i.e., it does not depend on  $n$ .

857 We prove by induction on infinitesimal steps  $\delta t$ . First when  $t = 0$ , both conditions hold due to the  
 858 initial condition  $Z(0) = 0$ . Then we assume that both conditions hold for time  $t$ , then by symmetry,  
 859 we know that for any  $n_1$  and any distinct  $l_1 \in G_{DT}(n_1)$ ,

$$\dot{z}_{l_1}(t) = \eta_Z \gamma f_{n_1 l_1}^2 \sum_{n' \neq n_1} \beta_{n_1 n'} \mathbf{f}_{n_1}^\top \mathbf{f}_{n'} = \eta_Z \gamma f_{n_2 l_2}^2 \sum_{n' \neq n_2} \beta_{n_2 n'} \mathbf{f}_{n_2}^\top \mathbf{f}_{n'} = \dot{z}_{l_2}(t) \quad (101)$$

860 where  $l_2 = \phi(l_1)$  is the image of the distinct token  $l_1$ . This is because (1)  $\mathbf{f}_{n_1}^\top \mathbf{f}_{n'} =$   
 861  $\sum_{l \in G_{CT}^*} \rho_l^2 \exp(2z_l(t)) / o^2(t)$  is independent of  $n_1$  and  $n'$  by inductive hypothesis, therefore,  $\beta$   
 862 is also independent of its subscripts. And (2)  $f_{n_1 l_1}^2 := \tilde{c}_{l_1|n_1}^2 / o^2(t) = \tilde{c}_{l_2|n_2}^2 / o^2(t) = f_{n_2 l_2}^2$ .

863 Therefore,  $\dot{z}_{l_1}(t) = \dot{z}_{l_2}(t)$ , which means that  $z_{l_1}(t') = z_{l_2}(t')$  for  $t' = t + \delta t$ .

Let  $G_{CT}(n_1, n_2) := \{l : \mathbb{P}(l|n_1)\mathbb{P}(l|n_2) > 0\}$  be the subset of common tokens shared between  $n_1$  and  $n_2$ , then for their associated  $n_1$  and  $n_2$ , obviously  $G_{CT}(n_1, n_2) \subseteq G_{CT}$  and we have:

$$o_{n_1}(t') = \sum_l \tilde{c}_{l|n_1}^2(t') = \sum_l \mathbb{P}^2(l|n_1) \exp(2z_l(t')) \quad (102)$$

$$= \sum_{l_1 \in G_{DT}(n_1)} \mathbb{P}^2(l_1|n_1) \exp(2z_{l_1}(t')) + \sum_{l \in G_{CT}(n_1, n_2)} \mathbb{P}^2(l|n_1) \exp(2z_l(t')) \quad (103)$$

$$= \sum_{l_1 \in G_{DT}(n_1)} \mathbb{P}^2(\phi(l_1)|n_2) \exp(2z_{\phi(l_1)}(t')) + \sum_{l \in G_{CT}(n_1, n_2)} \rho_l^2 \exp(2z_l(t')) \quad (104)$$

$$= \sum_{l_2 \in G_{DT}(n_2)} \mathbb{P}^2(l_2|n_2) \exp(2z_{l_2}(t')) + \sum_{l \in G_{CT}(n_1, n_2)} \mathbb{P}^2(l|n_2) \exp(2z_l(t')) \quad (105)$$

$$= o_{n_2}(t') \quad (106)$$

So we prove the induction hypothesis holds for  $t' = t + \delta t$ . Let  $\delta t \rightarrow 0$  and we prove it for all  $t$ .

Now we check the dynamics of common token  $l \in G_{CT}$ . First we have for any  $n \neq n'$ ,  $f_{nl}^2(t) = \tilde{c}_{l|n}^2(t)/o^2(t) = \rho_l^2 \exp(2z_l(t))/o^2(t) = \tilde{c}_{l|n'}^2(t)/o^2(t) = f_{n'l}^2(t)$  and thus  $f_{nl}(t) = f_{n'l}(t) := f_l(t) > 0$ , therefore:

$$f_{nl} [(\mathbf{f}_n^\top \mathbf{f}_{n'}) f_{nl} - f_{n'l}] = -f_l^2(1 - \mathbf{f}_n^\top \mathbf{f}_{n'}) < 0 \quad (107)$$

On the other hand, from the proof on induction hypothesis, we know all off-diagonal elements of  $E$  are the same and are positive. Then all the off-diagonal elements of  $E'$  are also the same and are positive. Following Theorem 1, we know  $\beta_{nn'} > 0$  and is independent of the subscripts. Therefore,  $\dot{z}_l < 0$ .  $\square$

**Theorem 3** (Growth of distinct tokens). *For a next token  $n$  and its two distinct tokens  $l$  and  $l'$ , the dynamics of the **relative gain**  $r_{l/l'|n}(t) := f_{nl}^2(t)/f_{n'l'}^2(t) - 1 = \tilde{c}_{l|n}^2(t)/\tilde{c}_{l'|n}^2(t) - 1$  has the following analytic form:*

$$r_{l/l'|n}(t) = r_{l/l'|n}(0) e^{2(z_l(t) - z_l(0))} =: r_{l/l'|n}(0) \chi_l(t) \quad (11)$$

where  $\chi_l(t) := e^{2(z_l(t) - z_l(0))}$  is the **growth factor** of token  $l$ . If there exist a dominant token  $l_0$  such that the initial condition satisfies  $r_{l_0/l|n}(0) > 0$  for all its distinct token  $l \neq l_0$ , and all of its common tokens  $l$  satisfy  $\dot{z}_l < 0$ . Then both  $z_{l_0}(t)$  and  $f_{nl_0}(t)$  are monotonously increasing over  $t$ , and

$$e^{2f_{nl_0}^2(0)B_n(t)} \leq \chi_{l_0}(t) \leq e^{2B_n(t)} \quad (12)$$

here  $B_n(t) := \eta_Z \int_0^t \xi_n(t') dt'$ . Intuitively, larger  $B_n$  gives larger  $r_{l_0/l|n}$  and sparser attention map.

*Proof.* First of all, for tokens  $l$  and  $l'$  that are both distinct for a specific next token  $n$ , from Eqn. 98, it is clear that

$$\frac{\dot{z}_l}{\dot{z}_{l'}} = r_{l/l'|n}(t) + 1 = (r_{l/l'|n}(0) + 1) \frac{e^{2(z_l(t) - z_l(0))}}{e^{2(z_{l'}(t) - z_{l'}(0))}} \quad (108)$$

This means that

$$e^{-2(z_l - z_l(0))} \dot{z}_l = (r_{l/l'|n}(0) + 1) e^{-2(z_{l'} - z_{l'}(0))} \dot{z}_{l'} \quad (109)$$

Integrate both side over time  $t$  and we get:

$$e^{-2(z_l(t) - z_l(0))} - 1 = (r_{l/l'|n}(0) + 1) \left[ e^{-2(z_{l'}(t) - z_{l'}(0))} - 1 \right] \quad (110)$$

From this we can get the close-form relationship between  $r_{l/l'|n}(t)$  and  $z_l(t)$ :

$$r_{l/l'|n}(t) = r_{l/l'|n}(0) e^{2(z_l(t) - z_l(0))} \quad (111)$$

Now let  $l$  be the dominating distinct token  $l_0$ , then  $\dot{r}_{l_0/l'|n} = r_{l_0/l'|n}(0) e^{2(z_{l_0}(t) - z_{l_0}(0))} \dot{z}_{l_0} > 0$  for any token  $l'$  that is distinct to  $n$ , and  $\dot{r}_{l_0/l'|n} > 0$  for any common token  $l'$ , since  $\dot{z}_{l'} < 0$ . Therefore, we have:

$$\frac{d}{dt}(f_{nl_0}^2) = \frac{d}{dt} \left( \frac{1}{M + \sum_{l' \neq l_0} r_{l'/l_0|n}} \right) > 0 \quad (112)$$

Therefore,  $f_{nl_0}^2(t)$  is monotonously increasing. Combined with the fact  $f_{nl_0}^2(t) \leq 1$  due to normalization condition  $\|\mathbf{f}_n\|_2 = 1$ , we have:

$$\xi_n(t) \geq \frac{1}{\eta_Z} \dot{z}_{l_0} = f_{nl_0}^2(t) \xi_n(t) \geq f_{nl_0}^2(0) \xi_n(t) \quad (113)$$

Integrate over time and we have:

$$B(t) \geq \int_0^t \dot{z}_{l_0}(t') dt' = z_{l_0}(t) - z_{l_0}(0) \geq f_{nl_0}^2(0) B(t) \quad (114)$$

where  $B(t) := \eta_Z \int_0^t \xi_n(t') dt'$ . Plugging that into Eqn. 111, and we have:

$$e^{2f_{nl_0}^2(0)B(t)} \leq \chi_{l_0}(t) \leq e^{2B(t)} \quad (115)$$

□

## D Estimation in Sec. 6

**Theorem 4** (Phase Transition in Training). *If the dynamics of the single common token  $z_l$  satisfies  $\dot{z}_l = -K\rho^{-4}\eta_Z\gamma(t)e^{4z_l}$  and  $\xi_n(t) = K\rho^{-4}\gamma(t)e^{4z_l}$ , then we have:*

$$B_n(t) = \begin{cases} \frac{1}{4} \ln \left( \rho_0^4/K + \frac{2(M-1)^2}{KM^2} \eta_Y \eta_Z t^2 \right) & t < t'_0 := \frac{K \ln M}{\eta_Y} \\ \frac{1}{4} \ln \left( \rho_0^4/K + \frac{2K(M-1)^2}{M^2} \frac{\eta_Z}{\eta_Y} \ln^2(M\eta_Y t/K) \right) & t \geq t_0 := \frac{2(1+o(1))K \ln M}{\eta_Y} \end{cases} \quad (14)$$

As a result, there exists a phase transition during training:

- **Attention scanning.** At the beginning of the training,  $\gamma(t) = O(\eta_Y t/K)$  and  $B_n(t) \approx \frac{1}{4} \ln K^{-1}(\rho_0^4 + 2\eta_Y \eta_Z t^2) = O(\ln t)$ . This means that the growth factor for dominant token  $l_0$  is (sub-)linear:  $\chi_{l_0}(t) \geq e^{2f_{nl_0}^2(0)B_n(t)} \approx [K^{-1}(\rho_0^4 + 2\eta_Y \eta_Z t^2)]^{0.5f_{nl_0}^2(0)}$ , and the attention on less co-occurred token drops gradually.
- **Attention snapping.** When  $t \geq t_0 := 2(1 + \delta')K \ln M/\eta_Y$  with  $\delta' = \Theta(\frac{\ln \ln M}{\ln M})$ ,  $\gamma(t) = O\left(\frac{K \ln(\eta_Y t/K)}{\eta_Y t}\right)$  and  $B_n(t) = O(\ln \ln t)$ . Therefore, while  $B_n(t)$  still grows to infinite, the growth factor  $\chi_{l_0}(t) = O(\ln t)$  grows at a much slower logarithmic rate.

*Proof.* We start from the two following assumptions:

$$\dot{z}_l = -K\rho_0^{-4}\eta_Z\gamma(t)\exp(4z_l) \quad (116)$$

$$\xi_n(t) = K\rho_0^{-4}\gamma(t)\exp(4z_l) \quad (117)$$

Given that, we can derive the dynamics of  $z_l(t)$  and  $\xi_n(t)$ :

$$\exp(-4z_l)\dot{z}_l = -K\rho_0^{-4}\eta_Z\gamma(t) \quad (118)$$

$$d\exp(-4z_l) = 4K\rho_0^{-4}\eta_Z\gamma(t)dt \quad (119)$$

$$\exp(-4z_l) = 4K\rho_0^{-4}\eta_Z \int_0^t \gamma(t')dt' + 1 \quad (\text{use } z_l(0) = 0) \quad (120)$$

Let  $\Gamma(t) := \eta_Z \int_0^t \gamma(t')dt'$ , then  $\Gamma(0) = 0$  and  $d\Gamma(t) = \eta_Z\gamma(t)dt$ . Therefore, we have

$$\xi_n(t) = K\rho_0^{-4}\gamma(t)\exp(4z_l) = \frac{\gamma(t)}{\rho_0^4/K + 4\Gamma(t)} \quad (121)$$

and thus  $B_n(t) := \eta_Z \int_0^t \xi_n(t')dt'$  can be integrated analytically, regardless of the specific form of  $\gamma(t)$ :

$$B_n(t) = \eta_Z \int_0^t \frac{\gamma(t')dt'}{\rho_0^4/K + 4\Gamma(t)} = \int_0^t \frac{d\Gamma}{\rho_0^4/K + 4\Gamma} = \frac{1}{4} \ln(\rho_0^4/K + 4\Gamma(t)) \quad (122)$$

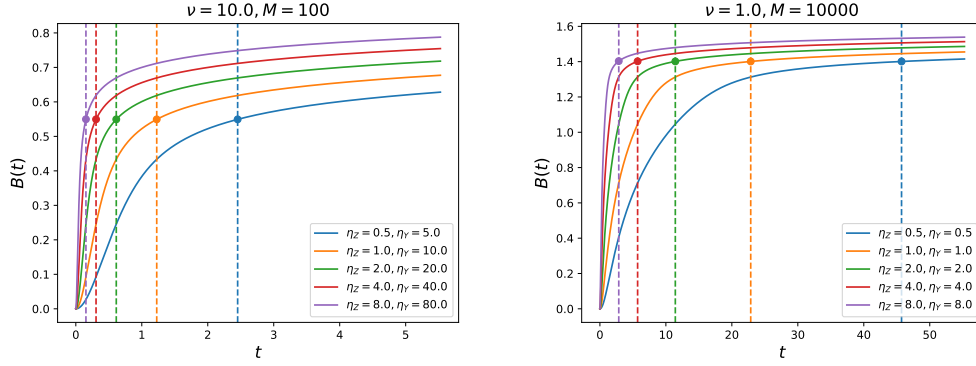

Figure 9: Numerical simulation of  $B_n(t)$  with changing  $\eta_Z$  and fixed  $\nu = \eta_Z/\eta_Y$ . The dotted line denotes the transition time  $t_0$ , and  $B_n(t_0)$  marked with the solid dot is independent of  $\eta_Z$ .

Recall that  $\gamma(t) = \frac{(M-1)^2 h(t/K)}{M-1+\exp(Mh(t/K))}$  (Theorem 1). Note that  $h$  (if treated in continuous time step) is strictly monotonically increasing and satisfies  $h(0) = 0, dh(t/K) = \eta_Y(M-1 + \exp(Mh(t/K)))^{-1} dt/K$  (Lemma 6 and Lemma 7), we can let  $\gamma(h) := \frac{(M-1)^2 h}{M-1+\exp(Mh)}$  and get:

$$\Gamma(t) := \eta_Z \int_{t=0}^t \gamma(t') dt' \quad (123)$$

$$= \eta_Z K \int_{h(0)}^{h(t/K)} \gamma(h') \cdot \frac{M-1+\exp(Mh')}{\eta_Y} \cdot dh' \quad (124)$$

$$= \frac{\eta_Z}{\eta_Y} K(M-1)^2 \int_{h(0)}^{h(t/K)} h' dh' \quad (125)$$

$$= \frac{\eta_Z}{\eta_Y} \cdot \frac{K(M-1)^2}{2} h^2(t/K) \quad (126)$$

Therefore,  $B_n(t)$  has a close form with respect to  $h$ :

$$B_n(t) = \frac{1}{4} \ln \left( \rho_0^4/K + 2 \frac{\eta_Z}{\eta_Y} K(M-1)^2 h^2(t/K) \right) \quad (127)$$

(1) When  $t < t'_0 := K \ln(M)/\eta_Y$ , from Lemma 9 we have  $h(t/K) = (1 + o(1)) \cdot \eta_Y t/(MK)$ . We neglect the  $o(1)$  term and denote  $\nu := \eta_Y/\eta_Z$ , then we have when  $t \leq t'_0$ :

$$B_n(t) = \frac{1}{4} \ln \left( \rho_0^4/K + \frac{2(M-1)^2}{\nu K M^2} \eta_Y^2 t^2 \right) \quad (128)$$

And  $B_n(t'_0) = \frac{1}{4} \ln \left( \rho_0^4/K + 2K(M-1)^2 M^{-2} \nu^{-1} \ln^2(M) \right)$ .

(2) Similarly, when  $t > t_0 := 2(1 + \omega_1)K \ln M/\eta_Y$  with  $\omega_1 = \Theta(\ln \ln M/\ln M)$  is defined in Lemma 8, from Lemma 9 we have  $h(t/K) = (1 + o(1)) \ln(M\eta_Y t/K)/M$ . We neglect the  $o(1)$  term and get when  $t > t_0$ :

$$B_n(t) = \frac{1}{4} \ln \left( \rho_0^4/K + \frac{2K(M-1)^2}{\nu M^2} \ln^2(M\eta_Y t/K) \right) \quad (129)$$

From this we know  $B_n(t_0) = \frac{1}{4} \ln(\rho_0^4/K + 2K(M-1)^2 M^{-2} \nu^{-1} \ln^2(2(1 + \omega_1)M \ln M))$ . It's interesting to find that  $B_n(t_0)$  just depends on  $K, M$  and  $\nu$ , and thus fixing  $\nu$  and changing  $\eta_Z$  will not influence the value of  $B_n(t_0)$ , which means that the main difference between  $B_n$  is arises at the stage  $t > t_0$ . This matches the results in Fig. 9.

(3) Finally, we estimate  $B_n(t)$  when  $t$  is large. When  $\nu$  is fixed and  $t \gg (M\eta_Y)^{-1} \exp(1/\sqrt{2\nu})$ , we have

$$B_n(t) = (1 + o(1)) \cdot \left[ \frac{1}{2} \ln \ln(M\eta_Y t/K) + \frac{1}{4} \ln(2K(M-1)^2 M^{-2} \nu^{-1}) \right] \quad (130)$$

$$= \Theta(\ln \ln(\frac{M\eta_Y t}{K}) - \ln(\frac{\nu}{K})) \quad (131)$$

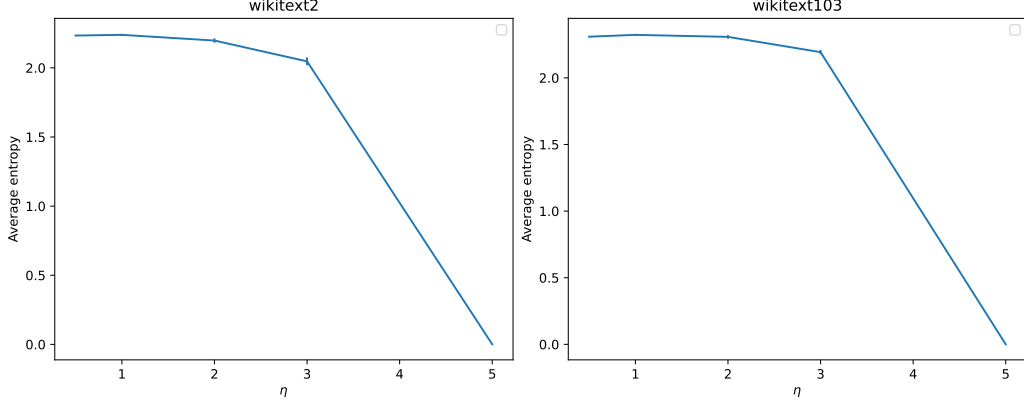

Figure 10: Average self-attention map entropy over the validation sets in 1-layer transformer after training, when the learning rate  $\eta_Y$  and  $\eta_Z$  changes. Note that higher learning rate  $\eta$  leads to higher  $B_n(t)$  and thus low entropy (i.e., more sparsity), which is consistent with our theoretical finding (Sec. 6). All the experiments are repeated in 5 random seeds. Error bar with 1-std is shown in the figure.

926 Therefore, from Eqn. 131 we get:

927 (a) Fix  $\nu$ , larger  $\eta_Z$  result in larger  $B_n(t)$  and sparser attention map.

928 (b) Fix  $\eta_Z$ , larger  $\nu$  (i.e., larger  $\eta_Y$ ) result in smaller  $B_n(t)$  and denser attention map since  $\ln \ln(x)$   
 929 is much slower than  $\ln(x)$ .

930 These match our experimental results in the main paper (Fig. 6).  $\square$

## 931 E Experiments

932 We use WikiText [47] dataset to verify our theoretical findings. This includes two datasets, Wiki-  
 933 Text2 and WikiText103. We train both on 1-layer transformer with SGD optimizer. Instead of using  
 934 reparameterization  $Y$  and  $Z$  (Sec. 3.2), we choose to keep the original parameterization with token  
 935 embedding  $U$  and train with a unified learning rate  $\eta$  until convergence. Fig. 10 shows that the av-  
 936 eraged entropy of the self-attention map evaluated in the validation set indeed drops with when the  
 937 learning rate  $\eta$  becomes larger.

938 Note that in the original parameterization, it is not clear how to set  $\eta_Y$  and  $\eta_Z$  properly and we leave  
 939 it for future work.

## 940 F Technical Lemma

941 **Lemma 18.** Let  $\mathbf{h} = [h_1, h_2, \dots, h_M]^\top \in \mathbb{R}^M$  is some  $M$ -dimensional vector,  $\mathbf{h}_X :=$   
 942  $[h_{x_1}, \dots, h_{x_{T-1}}]^\top \in \mathbb{R}^{T-1}$  is a vector constructed by input sequence  $X$ , then given event  $x_T =$   
 943  $m$ ,  $x_{T+1} = n$ , there exists some  $\mathbf{q}_{m,n} = [q_{1|m,n}, q_{2|m,n}, \dots, q_{M|m,n}]^\top \in \mathbb{R}^M$  so that  $\mathbf{q} \geq 0$   
 944 and

$$\frac{1}{T-1} X^\top \mathbf{h}_X = \sum_{l=1}^M q_{l|m,n} h_l \mathbf{e}_l = \mathbf{q}_{m,n} \circ \mathbf{h} \quad (132)$$

$$\frac{1}{T-1} X^\top \text{diag}(\mathbf{h}_X) X = \sum_{l=1}^M q_{l|m,n} h_l \mathbf{e}_l \mathbf{e}_l^\top = \text{diag}(\mathbf{q}_{m,n} \circ \mathbf{h}) \quad (133)$$

945 where  $q_{l|m,n}$  satisfies  $\sum_{l=1}^M q_{l|m,n} = 1$ . And with probability at least  $1 - \delta$  we have

$$\max \left( 0, \mathbb{P}(l|m, n) - \sqrt{\frac{\ln(2/\delta)}{2(T-1)}} \right) \leq q_{l|m,n} \leq \mathbb{P}(l|m, n) + \sqrt{\frac{\ln(2/\delta)}{2(T-1)}} \quad (134)$$

946 And thus  $q_{l|m,n} \rightarrow \mathbb{P}(l|m, n)$  when  $T \rightarrow +\infty$ .

947 *Proof.* Given that  $x_T = m$  and  $x_{T+1} = n$ , then we have

$$\frac{1}{T-1} X^\top \mathbf{h}_X = \frac{1}{T-1} \sum_{t=1}^{T-1} h_{x_t} \mathbf{x}_t = \sum_{l=1}^M \left( \frac{1}{T-1} \sum_{t=1}^{T-1} \mathbb{I}[x_t = l] \right) h_l \mathbf{e}_l =: \sum_{l=1}^M q_{l|m,n} h_l \mathbf{e}_l \quad (135)$$

948 And similar equations hold for  $\frac{1}{T-1} X^\top \text{diag}(\mathbf{h}_X) X$ . Then we consider the case that the previous  
 949 tokens are generated by conditional probability  $\mathbb{P}(l|m, n)$  as the data generation part, so  $\mathbb{I}[x_t =$   
 950  $l], \forall t \in [T-1]$  are *i.i.d.* Bernoulli random variables with probability  $\mathbb{P}(l|m, n)$  and  $T q_{l|m,n}$  satisfies  
 951 binomial distribution. By Hoeffding inequality, we get

$$\mathbb{P}(|q_{l|m,n} - \mathbb{P}(l|m, n)| \geq t) \leq 2 \exp(-2(T-1)t^2) \quad (136)$$

952 Then we get the results by direct calculation. □
